# Supplementary material for: Cumulative Evidence for Relationships Between Multiple Variants in the TERT and CLPTM1L Region and Risk of Cancer and Non-Cancer Disease
Source: PubMed Central journal article supplement (PMC9279858; doi:10.3389/fonc.2022.946039), 2022-06-30
Supplement: DataSheet_3.pdf [file DataSheet_3.pdf]

**Supplementary Table 2. Characteristics of the included articles.**

| Ref Number | First author, year | Disease                             | Disease Type | Country/region | Ethnicity | Study design       | Gene name | variant        | Allelic | Case | control | Sample size |
|------------|--------------------|-------------------------------------|--------------|----------------|-----------|--------------------|-----------|----------------|---------|------|---------|-------------|
| 1          | Savage SA, 2007    | Breast cancer                       |              | Poland         | Caucasian | Case-control study | TERT      | rs2736109 G/A  | G/A     | 1995 | 2296    | 4291        |
| 1          | Savage SA, 2007    | Breast cancer                       |              | Poland         | Caucasian | Case-control study | TERT      | rs2735940 A/G  | A/G     | 1995 | 2296    | 4291        |
| 1          | Savage SA, 2007    | Breast cancer                       |              | Poland         | Caucasian | Case-control study | TERT      | rs7712562 A/C  | A/C     | 1995 | 2296    | 4291        |
| 1          | Savage SA, 2007    | Breast cancer                       |              | Poland         | Caucasian | Case-control study | TERT      | rs2853669 T/C  | T/C     | 1995 | 2296    | 4291        |
| 1          | Savage SA, 2007    | Breast cancer                       |              | Poland         | Caucasian | Case-control study | TERT      | rs2736098 C/T  | C/T     | 1995 | 2296    | 4291        |
| 1          | Savage SA, 2007    | Breast cancer                       |              | Poland         | Caucasian | Case-control study | TERT      | rs2853677 G/A  | G/A     | 1995 | 2296    | 4291        |
| 1          | Savage SA, 2007    | Breast cancer                       |              | Poland         | Caucasian | Case-control study | TERT      | rs13167280 G/A | G/A     | 1995 | 2296    | 4291        |
| 1          | Savage SA, 2007    | Breast cancer                       |              | Poland         | Caucasian | Case-control study | TERT      | rs2075786 A/G  | A/G     | 1995 | 2296    | 4291        |
| 1          | Savage SA, 2007    | Breast cancer                       |              | Poland         | Caucasian | Case-control study | TERT      | rs2853690 G/T  | G/T     | 1995 | 2296    | 4291        |
| 2          | Wang Y, 2008       | Breast cancer                       |              | China          | Caucasian | Case-control study | TERT      | MNS16A L/S     | L/S     | 1006 | 1095    | 2101        |
| 3          | Mushiroda T,2008   | Idiopathic pulmonary fibrosis (IPF) |              | Japan          | Asian     | GWAS               | TERT      | rs2736100 C/A  | C/A     | 159  | 934     | 1093        |
| 3          | Mushiroda T,2008   | Idiopathic pulmonary fibrosis (IPF) |              | Japan          | Asian     | Case-control study | TERT      | rs2736100 C/A  | C/A     | 83   | 535     | 618         |

|   |               |             |            |                                                                                  |           |      |              |               |     |      |      |      |
|---|---------------|-------------|------------|----------------------------------------------------------------------------------|-----------|------|--------------|---------------|-----|------|------|------|
| 4 | Wang YF, 2008 | Lung cancer | Miscellany | United Kingdom (UK)                                                              | Caucasian | GWAS | CLPTM1L      | rs401681 C/T  | C/T | 1952 | 1438 | 3390 |
| 4 | Wang YF, 2008 | Lung cancer | NSCLC      | USA                                                                              | Caucasian | GWAS | CLPTM1L      | rs401681 C/T  | C/T | 1154 | 1137 | 2291 |
| 4 | Wang YF, 2008 | Lung cancer | Miscellany | Europe countries (Czech Republic, Hungary, Poland, Romania, Russia and Slovakia) | Caucasian | GWAS | CLPTM1L      | rs401681 C/T  | C/T | 1989 | 2625 | 4614 |
| 4 | Wang YF, 2008 | Lung cancer | Miscellany | United Kingdom (UK)                                                              | Caucasian | GWAS | TERT/CLPTM1L | rs4975616 G/A | G/A | 1952 | 1438 | 3390 |
| 4 | Wang YF, 2008 | Lung cancer | NSCLC      | USA                                                                              | Caucasian | GWAS | TERT/CLPTM1L | rs4975616 G/A | G/A | 1154 | 1137 | 2291 |
| 4 | Wang YF, 2008 | Lung cancer | Miscellany | Europe countries (Czech Republic, Hungary, Poland, Romania, Russia and Slovakia) | Caucasian | GWAS | TERT/CLPTM1L | rs4975616 G/A | G/A | 1989 | 2625 | 4614 |
| 4 | Wang YF, 2008 | Lung cancer | Miscellany | United Kingdom (UK)                                                              | Caucasian | GWAS | CLPTM1L      | rs31489 C/A   | C/A | 1952 | 1438 | 3390 |

|   |               |             |                                          |                                                                                                                    |           |                    |         |               |     |      |      |      |
|---|---------------|-------------|------------------------------------------|--------------------------------------------------------------------------------------------------------------------|-----------|--------------------|---------|---------------|-----|------|------|------|
| 4 | Wang YF, 2008 | Lung cancer | NSCLC                                    | USA<br>Europe<br>countries<br>(Czech<br>Republic,<br>Hungary,<br>Poland,<br>Romania,<br>Russia<br>and<br>Slovakia) | Caucasian | GWAS               | CLPTM1L | rs31489 C/A   | C/A | 1154 | 1137 | 2291 |
| 4 | Wang YF, 2008 | Lung cancer | Miscellany                               | United<br>Kingdom<br>(UK)                                                                                          | Caucasian | GWAS               | CLPTM1L | rs31489 C/A   | C/A | 1989 | 2625 | 4614 |
| 4 | Wang YF, 2008 | Lung cancer | Small cell<br>carcinoma                  | United<br>Kingdom<br>(UK)                                                                                          | Caucasian | GWAS               | CLPTM1L | rs401681 C/T  | C/T | 1028 | 1438 | 2466 |
| 4 | Wang YF, 2008 | Lung cancer | NSCLC                                    | United<br>Kingdom<br>(UK)                                                                                          | Caucasian | GWAS               | CLPTM1L | rs401681 C/T  | C/T | 3316 | 1438 | 4754 |
| 4 | Wang YF, 2008 | Lung cancer | NSCLC<br>(Squamous<br>cell<br>carcinoma) | United<br>Kingdom<br>(UK)                                                                                          | Caucasian | GWAS               | CLPTM1L | rs401681 C/T  | C/T | 1513 | 1438 | 2951 |
| 4 | Wang YF, 2008 | Lung cancer | NSCLC<br>(Adenocar<br>cinoma)            | United<br>Kingdom<br>(UK)                                                                                          | Caucasian | GWAS               | CLPTM1L | rs401681 C/T  | C/T | 939  | 1438 | 2377 |
| 4 | Wang YF, 2008 | Lung cancer | NSCLC<br>(Squamous<br>cell<br>carcinoma) | USA                                                                                                                | Caucasian | GWAS               | CLPTM1L | rs401681 C/T  | C/T | 306  | 1137 | 1443 |
| 4 | Wang YF, 2008 | Lung cancer | NSCLC<br>(Adenocar<br>cinoma)            | USA                                                                                                                | Caucasian | GWAS               | CLPTM1L | rs401681 C/T  | C/T | 620  | 1137 | 1757 |
| 5 | Jin GF, 2009  | Lung cancer | NSCLC                                    | China                                                                                                              | Asian     | Case-control study | TERT    | rs2736100 C/A | C/A | 1221 | 1344 | 2565 |
| 5 | Jin GF, 2009  | Lung cancer | NSCLC                                    | China                                                                                                              | Asian     | Case-control study | CLPTM1L | rs402710 C/T  | C/T | 1221 | 1344 | 2565 |

|    |                     |               |            |                     |           |                    |              |               |     |      |      |       |
|----|---------------------|---------------|------------|---------------------|-----------|--------------------|--------------|---------------|-----|------|------|-------|
| 6  | Varadi V, 2009      | Breast cancer |            | Poland              | Caucasian | Case-control study | TERT         | rs2853669 T/C | T/C | 768  | 460  | 1228  |
| 6  | Varadi V, 2009      | Breast cancer |            | Sweden              | Caucasian | Case-control study | TERT         | rs2853669 T/C | T/C | 766  | 1519 | 2285  |
| 7  | Zienolddiny S, 2009 | Lung cancer   | Miscellany | Norway              | Caucasian | Case-control study | CLPTM1L      | rs402710 C/T  | C/T | 365  | 440  | 805   |
| 7  | Zienolddiny S, 2009 | Lung cancer   | Miscellany | Norway              | Caucasian | Case-control study | CLPTM1L      | rs401681 C/T  | C/T | 365  | 440  | 805   |
| 8  | Shete S, 2009       | Glioma        |            | France              | Caucasian | Case-control study | TERT         | rs2736100 C/A | C/A | 1392 | 1602 | 2994  |
| 8  | Shete S, 2009       | Glioma        |            | France              | Caucasian | Case-control study | TERT         | rs2853676 T/C | T/C | 1392 | 1602 | 2994  |
| 8  | Shete S, 2009       | Glioma        |            | Germany             | Caucasian | Case-control study | TERT         | rs2736100 C/A | C/A | 504  | 573  | 1077  |
| 8  | Shete S, 2009       | Glioma        |            | Germany             | Caucasian | Case-control study | TERT         | rs2853676 T/C | T/C | 504  | 573  | 1077  |
| 8  | Shete S, 2009       | Glioma        |            | Sweden              | Caucasian | Case-control study | TERT         | rs2736100 C/A | C/A | 649  | 778  | 1427  |
| 8  | Shete S, 2009       | Glioma        |            | Sweden              | Caucasian | Case-control study | TERT         | rs2853676 T/C | T/C | 649  | 778  | 1427  |
| 8  | Shete S, 2009       | Glioma        |            | United Kingdom (UK) | Caucasian | GWAS               | TERT         | rs2736100 C/A | C/A | 631  | 1434 | 2065  |
| 8  | Shete S, 2009       | Glioma        |            | United Kingdom (UK) | Caucasian | GWAS               | TERT         | rs2853676 T/C | T/C | 631  | 1434 | 2065  |
| 8  | Shete S, 2009       | Glioma        |            | USA                 | Caucasian | GWAS               | TERT         | rs2736100 C/A | C/A | 1247 | 2236 | 3483  |
| 8  | Shete S, 2009       | Glioma        |            | USA                 | Caucasian | GWAS               | TERT         | rs2853676 T/C | T/C | 1247 | 2236 | 3483  |
| 9  | Broderick P, 2009   | Lung cancer   | Miscellany | United Kingdom (UK) | Caucasian | GWAS               | TERT/CLPTM1L | rs4975616 G/A | G/A | 4019 | 907  | 4926  |
| 9  | Broderick P, 2009   | Lung cancer   | Miscellany | United Kingdom (UK) | Caucasian | GWAS               | TERT         | rs2736100 C/A | C/A | 4019 | 907  | 4926  |
| 10 | Varadi V, 2009      | Breast cancer |            | Sweden              | Caucasian | Case-control study | TERT         | rs2853669 T/C | T/C | 782  | 1559 | 2341  |
| 11 | Choi JE, 2009       | Lung cancer   | Miscellany | Korea               | Asian     | Case-control study | TERT         | rs2736098 C/T | C/T | 239  | 553  | 792   |
| 12 | Landi MT, 2009      | Lung cancer   | Miscellany | multiple            | Caucasian | GWAS               | CLPTM1L      | rs31489 C/A   | C/A | 5739 | 5848 | 11587 |

|    |               |               |                                 |                     |           |                    |              |               |     |      |      |      |
|----|---------------|---------------|---------------------------------|---------------------|-----------|--------------------|--------------|---------------|-----|------|------|------|
|    |               |               |                                 | countries           |           |                    |              |               |     |      |      |      |
| 13 | Wang YF, 2010 | Lung cancer   | Miscellany                      | United Kingdom (UK) | Caucasian | Case-control study | TERT         | rs2736100 C/A | C/A | 239  | 553  | 792  |
| 13 | Wang YF, 2010 | Lung cancer   | Miscellany                      | United Kingdom (UK) | Caucasian | Case-control study | TERT/CLPTM1L | rs4975616 G/A | G/A | 239  | 553  | 792  |
| 13 | Wang YF, 2010 | Lung cancer   | NSCLC                           | United Kingdom (UK) | Caucasian | Case-control study | TERT         | rs2736100 C/A | C/A | 200  | 553  | 753  |
| 13 | Wang YF, 2010 | Lung cancer   | NSCLC                           | United Kingdom (UK) | Caucasian | Case-control study | TERT/CLPTM1L | rs4975616 G/A | G/A | 200  | 553  | 753  |
| 13 | Wang YF, 2010 | Lung cancer   | NSCLC (Adenocarcinoma)          | United Kingdom (UK) | Caucasian | Case-control study | TERT         | rs2736100 C/A | C/A | 112  | 553  | 665  |
| 13 | Wang YF, 2010 | Lung cancer   | NSCLC (Squamous cell carcinoma) | United Kingdom (UK) | Caucasian | Case-control study | TERT         | rs2736100 C/A | C/A | 48   | 553  | 601  |
| 14 | Shen J, 2010  | Breast cancer |                                 | multiple countries  | Caucasian | Case-control study | TERT         | MNS16A L/S    | L/S | 1067 | 1110 | 2177 |
| 14 | Shen J, 2010  | Breast cancer |                                 | multiple countries  | Caucasian | Case-control study | TERT         | rs2075786 A/G | A/G | 1067 | 1110 | 2177 |
| 14 | Shen J, 2010  | Breast cancer |                                 | multiple countries  | Caucasian | Case-control study | TERT         | rs2853690 G/T | G/T | 1067 | 1110 | 2177 |
| 14 | Shen J, 2010  | Breast cancer |                                 | multiple countries  | Caucasian | Case-control study | TERT         | rs2736109 G/A | G/A | 1067 | 1110 | 2177 |
| 14 | Shen J, 2010  | Breast cancer |                                 | multiple countries  | Caucasian | Case-control study | TERT         | rs2735940 A/G | A/G | 1067 | 1110 | 2177 |
| 14 | Shen J, 2010  | Breast cancer |                                 | multiple countries  | Caucasian | Case-control study | TERT         | rs7712562 A/C | A/C | 1067 | 1110 | 2177 |

|    |                 |               |                  |                    |           |                    |         |                |     |      |       |       |
|----|-----------------|---------------|------------------|--------------------|-----------|--------------------|---------|----------------|-----|------|-------|-------|
| 14 | Shen J, 2010    | Breast cancer |                  | multiple countries | Caucasian | Case-control study | TERT    | rs2853677 G/A  | G/A | 1067 | 1110  | 2177  |
| 14 | Shen J, 2010    | Breast cancer |                  | multiple countries | Caucasian | Case-control study | TERT    | rs13167280 G/A | G/A | 1067 | 1110  | 2177  |
| 14 | Shen J, 2010    | Breast cancer |                  | multiple countries | Caucasian | Case-control study | TERT    | rs2853669 T/C  | T/C | 1067 | 1110  | 2177  |
| 15 | Truong T, 2010  | Lung cancer   | Miscellany       | multiple countries | Caucasian | Case-control study | TERT    | rs2736100 C/A  | C/A | 9951 | 12828 | 22779 |
| 15 | Truong T, 2010  | Lung cancer   | Miscellany       | multiple countries | Caucasian | Case-control study | CLPTM1L | rs402710 C/T   | C/T | 9951 | 12828 | 22779 |
| 15 | Truong T, 2010  | Lung cancer   | Miscellany       | multiple countries | Asian     | Case-control study | TERT    | rs2736100 C/A  | C/A | 1694 | 2126  | 3820  |
| 15 | Truong T, 2010  | Lung cancer   | Miscellany       | multiple countries | Asian     | Case-control study | CLPTM1L | rs402710 C/T   | C/T | 1694 | 2126  | 3820  |
| 16 | Hsiung CA, 2010 | Lung cancer   | (Adenocarcinoma) | China              | Asian     | GWAS               | TERT    | rs2736100 C/A  | C/A | 584  | 585   | 1169  |
| 16 | Hsiung CA, 2010 | Lung cancer   | Miscellany       | China              | Asian     | Case-control study | TERT    | rs2736100 C/A  | C/A | 610  | 560   | 1170  |
| 16 | Hsiung CA, 2010 | Lung cancer   | (Adenocarcinoma) | China              | Asian     | Case-control study | TERT    | rs2736100 C/A  | C/A | 407  | 560   | 967   |
| 16 | Hsiung CA, 2010 | Lung cancer   | Miscellany       | China              | Asian     | Case-control study | TERT    | rs2736100 C/A  | C/A | 287  | 287   | 574   |
| 16 | Hsiung CA, 2010 | Lung cancer   | (Adenocarcinoma) | China              | Asian     | Case-control study | TERT    | rs2736100 C/A  | C/A | 188  | 287   | 475   |
| 16 | Hsiung CA, 2010 | Lung cancer   | Miscellany       | Korea              | Asian     | Case-control study | TERT    | rs2736100 C/A  | C/A | 259  | 293   | 552   |
| 16 | Hsiung CA, 2010 | Lung cancer   | (Adenocarcinoma) | Korea              | Asian     | Case-control study | TERT    | rs2736100 C/A  | C/A | 197  | 293   | 490   |
| 16 | Hsiung CA, 2010 | Lung cancer   | Miscellany       | China              | Asian     | Cohort study       | TERT    | rs2736100 C/A  | C/A | 209  | 213   | 422   |
| 16 | Hsiung CA, 2010 | Lung cancer   | (Adenocarcinoma) | China              | Asian     | Cohort study       | TERT    | rs2736100 C/A  | C/A | 94   | 213   | 307   |

|    |                 |             |                               |                       |       |                    |         |               |     |      |      |      |
|----|-----------------|-------------|-------------------------------|-----------------------|-------|--------------------|---------|---------------|-----|------|------|------|
| 16 | Hsiung CA, 2010 | Lung cancer | Miscellany<br>NSCLC           | China                 | Asian | Case-control study | TERT    | rs2736100 C/A | C/A | 207  | 207  | 414  |
| 16 | Hsiung CA, 2010 | Lung cancer | (Adenocar<br>cinoma)          | China                 | Asian | Case-control study | TERT    | rs2736100 C/A | C/A | 89   | 207  | 296  |
| 16 | Hsiung CA, 2010 | Lung cancer | Miscellany<br>NSCLC           | Korea                 | Asian | Case-control study | TERT    | rs2736100 C/A | C/A | 121  | 119  | 240  |
| 16 | Hsiung CA, 2010 | Lung cancer | (Adenocar<br>cinoma)          | Korea                 | Asian | Case-control study | TERT    | rs2736100 C/A | C/A | 103  | 119  | 222  |
| 16 | Hsiung CA, 2010 | Lung cancer | Miscellany<br>NSCLC           | Korea                 | Asian | Case-control study | TERT    | rs2736100 C/A | C/A | 95   | 87   | 182  |
| 16 | Hsiung CA, 2010 | Lung cancer | (Adenocar<br>cinoma)          | Korea                 | Asian | Case-control study | TERT    | rs2736100 C/A | C/A | 66   | 87   | 153  |
| 16 | Hsiung CA, 2010 | Lung cancer | Miscellany                    | multiple<br>countries | Asian | Case-control study | TERT    | rs4246742 T/A | T/A | 2768 | 3100 | 5868 |
| 16 | Hsiung CA, 2010 | Lung cancer | Miscellany                    | multiple<br>countries | Asian | Case-control study | TERT    | rs2242652 G/A | G/A | 2768 | 3100 | 5868 |
| 16 | Hsiung CA, 2010 | Lung cancer | Miscellany                    | multiple<br>countries | Asian | Case-control study | CLPTM1L | rs402710 C/T  | C/T | 2768 | 3100 | 5868 |
| 16 | Hsiung CA, 2010 | Lung cancer | (Adenocar<br>cinoma)<br>NSCLC | multiple<br>countries | Asian | Case-control study | CLPTM1L | rs402710 C/T  | C/T | 2003 | 3100 | 3103 |
| 17 | Miki D, 2010    | Lung cancer | (Adenocar<br>cinoma)<br>NSCLC | Japan                 | Asian | GWAS               | TERT    | rs2736100 C/A | C/A | 1004 | 1900 | 2904 |
| 17 | Miki D, 2010    | Lung cancer | (Adenocar<br>cinoma)<br>NSCLC | Japan                 | Asian | Replication stage  | TERT    | rs2736100 C/A | C/A | 525  | 7678 | 8203 |
| 17 | Miki D, 2010    | Lung cancer | (Adenocar<br>cinoma)          | Japan                 | Asian | Replication stage  | TERT    | rs2736100 C/A | C/A | 569  | 1470 | 2039 |
| 18 | Yoon KA, 2010   | Lung cancer | NSCLC                         | Korea                 | Asian | GWAS               | TERT    | rs2736100 C/A | C/A | 1425 | 3011 | 4436 |
| 18 | Yoon KA, 2010   | Lung cancer | NSCLC                         | Korea                 | Asian | GWAS               | TERT    | rs2736100 C/A | C/A | 1425 | 3011 | 4436 |
| 18 | Yoon KA, 2010   | Lung cancer | NSCLC                         | Korea                 | Asian | GWAS               | TERT    | rs2736100 C/A | C/A | 1425 | 3011 | 4436 |

|    |                        |                |                                 |                     |           |                           |         |               |     |      |      |      |
|----|------------------------|----------------|---------------------------------|---------------------|-----------|---------------------------|---------|---------------|-----|------|------|------|
| 18 | Yoon KA, 2010          | Lung cancer    | NSCLC                           | Korea               | Asian     | GWAS                      | CLPTM1L | rs402710 C/T  | C/T | 1425 | 3011 | 4436 |
| 18 | Yoon KA, 2010          | Lung cancer    | NSCLC                           | Korea               | Asian     | GWAS                      | CLPTM1L | rs402710 C/T  | C/T | 1425 | 3011 | 4436 |
| 18 | Yoon KA, 2010          | Lung cancer    | NSCLC                           | Korea               | Asian     | GWAS                      | CLPTM1L | rs402710 C/T  | C/T | 1425 | 3011 | 4436 |
| 18 | Yoon KA, 2010          | Lung cancer    | NSCLC                           | Korea               | Asian     | GWAS                      | CLPTM1L | rs401681 C/T  | C/T | 1425 | 3011 | 4436 |
| 18 | Yoon KA, 2010          | Lung cancer    | NSCLC                           | Korea               | Asian     | GWAS                      | CLPTM1L | rs401681 C/T  | C/T | 1425 | 3011 | 4436 |
| 18 | Yoon KA, 2010          | Lung cancer    | NSCLC                           | Korea               | Asian     | GWAS                      | CLPTM1L | rs401681 C/T  | C/T | 1425 | 3011 | 4436 |
| 19 | Gago Dominguez M, 2011 | Bladder cancer |                                 | USA                 | Caucasian | Case-control study        | CLPTM1L | rs401681 C/T  | C/T | 498  | 588  | 1086 |
| 19 | Gago Dominguez M, 2011 | Bladder cancer |                                 | China               | Asian     | Case-control study        | CLPTM1L | rs401681 C/T  | C/T | 506  | 530  | 1036 |
| 19 | Gago Dominguez M, 2011 | Bladder cancer |                                 | USA                 | Caucasian | Case-control study        | CLPTM1L | rs402710 C/T  | C/T | 498  | 588  | 1086 |
| 19 | Gago Dominguez M, 2011 | Bladder cancer |                                 | China               | Asian     | Case-control study        | CLPTM1L | rs402710 C/T  | C/T | 506  | 530  | 1036 |
| 19 | Gago Dominguez M, 2011 | Bladder cancer |                                 | USA                 | Caucasian | Case-control study        | TERT    | rs2736098 C/T | C/T | 498  | 588  | 1086 |
| 19 | Gago Dominguez M, 2011 | Bladder cancer |                                 | China               | Asian     | Case-control study        | TERT    | rs2736098 C/T | C/T | 506  | 530  | 1036 |
| 19 | Gago Dominguez M, 2011 | Bladder cancer |                                 | USA                 | Caucasian | Case-control study        | TERT    | rs2736100 C/A | C/A | 498  | 588  | 1086 |
| 19 | Gago Dominguez M, 2011 | Bladder cancer |                                 | China               | Asian     | Case-control study        | TERT    | rs2736100 C/A | C/A | 506  | 530  | 1036 |
| 20 | Nan HM, 2011           | Skin cancer    | melanoma                        | United Kingdom (UK) | Caucasian | Nested case-control study | CLPTM1L | rs401681 C/T  | C/T | 218  | 870  | 1088 |
| 21 | Chen HY, 2011          | Glioma         |                                 | China               | Asian     | Case-control study        | TERT    | rs2736100 C/A | C/A | 976  | 1057 | 2033 |
| 21 | Chen HY, 2011          | Glioma         |                                 | China               | Asian     | Case-control study        | TERT    | rs2853676 T/C | T/C | 976  | 1057 | 2033 |
| 22 | Kohno T, 2011          | Lung cancer    | NSCLC (Squamous cell carcinoma) | Japan               | Asian     | Case-control study        | TERT    | rs2736100 C/A | C/A | 377  | 325  | 702  |
| 23 | Hu ZB, 2011            | Lung cancer    | Miscellany                      | China               | Asian     | GWAS                      | CLPTM1L | rs465498 A/G  | A/G | 2331 | 3077 | 5408 |



|    |                    |                   |            |                         |           |                    |              |               |     |      |      |      |
|----|--------------------|-------------------|------------|-------------------------|-----------|--------------------|--------------|---------------|-----|------|------|------|
| 23 | Hu ZB, 2011        | Lung cancer       | Miscellany | China                   | Asian     | Case-control study | CLPTM1L      | rs465498 A/G  | A/G | 2283 | 2243 | 4526 |
| 23 | Hu ZB, 2011        | Lung cancer       | Miscellany | China                   | Asian     | Case-control study | CLPTM1L      | rs465498 A/G  | A/G | 4030 | 4166 | 8196 |
| 23 | Hu ZB, 2011        | Lung cancer       | Miscellany | China                   | Asian     | GWAS               | TERT         | rs2736100 C/A | C/A | 2331 | 3077 | 5408 |
| 23 | Hu ZB, 2011        | Lung cancer       | Miscellany | China                   | Asian     | Case-control study | TERT         | rs2736100 C/A | C/A | 2283 | 2243 | 4526 |
| 23 | Hu ZB, 2011        | Lung cancer       | Miscellany | China                   | Asian     | Case-control study | TERT         | rs2736100 C/A | C/A | 4030 | 4166 | 8196 |
| 24 | Pande M, 2011      | Lung cancer       | Miscellany | multiple countries      | Caucasian | Case-control study | CLPTM1L      | rs31489 C/A   | C/A | 1681 | 1635 | 3316 |
| 25 | Beesley J, 2011    | Breast cancer     |            | Austria                 | Caucasian | Case-control study | TERT         | rs2736109 G/A | G/A | 1118 | 934  | 2052 |
| 25 | Beesley J, 2011    | Breast cancer     |            | Germany                 | Caucasian | Case-control study | TERT         | rs2736109 G/A | G/A | 445  | 554  | 999  |
| 25 | Beesley J, 2011    | Breast cancer     |            | Germany                 | Caucasian | Case-control study | TERT         | rs2736109 G/A | G/A | 2387 | 4945 | 7332 |
| 25 | Beesley J, 2011    | Breast cancer     |            | Thailand                | Others    | Case-control study | TERT         | rs2736109 G/A | G/A | 327  | 567  | 894  |
| 26 | Jaworowska E, 2011 | Lung cancer       | Miscellany | Poland                  | Caucasian | Case-control study | TERT         | rs2736100 C/A | C/A | 874  | 1061 | 1935 |
| 26 | Jaworowska E, 2011 | Bladder cancer    |            | Poland                  | Caucasian | Case-control study | TERT         | rs2736100 C/A | C/A | 450  | 1061 | 1511 |
| 26 | Jaworowska E, 2011 | Lung cancer       | Miscellany | Poland                  | Caucasian | Case-control study | TERT         | rs2736098 C/T | C/T | 874  | 1061 | 1935 |
| 26 | Jaworowska E, 2011 | Bladder cancer    |            | Poland                  | Caucasian | Case-control study | TERT         | rs2736098 C/T | C/T | 450  | 1061 | 1511 |
| 26 | Jaworowska E, 2011 | Lung cancer       | Miscellany | Poland                  | Caucasian | Case-control study | CLPTM1L      | rs402710 C/T  | C/T | 874  | 1061 | 1935 |
| 26 | Jaworowska E, 2011 | Bladder cancer    |            | Poland                  | Caucasian | Case-control study | CLPTM1L      | rs402710 C/T  | C/T | 450  | 1061 | 1511 |
| 27 | Rizzato C, 2011    | Pancreatic cancer |            | Germany, United Kingdom | Caucasian | Case-control study | TERT/CLPTM1L | rs4635969 G/A | G/A | 114  | 136  | 250  |
| 27 | Rizzato C, 2011    | Pancreatic cancer |            | Germany, United Kingdom | Caucasian | Case-control study | TERT/CLPTM1L | rs4635969 G/A | G/A | 576  | 1141 | 1717 |

|    |                  |                   |                           |                         |           |                    |         |               |     |      |      |      |
|----|------------------|-------------------|---------------------------|-------------------------|-----------|--------------------|---------|---------------|-----|------|------|------|
| 27 | Rizzato C, 2011  | Pancreatic cancer |                           | Germany, United Kingdom | Caucasian | Case-control study | CLPTM1L | rs401681 C/T  | C/T | 114  | 136  | 250  |
| 27 | Rizzato C, 2011  | Pancreatic cancer |                           | Germany, United Kingdom | Caucasian | Case-control study | CLPTM1L | rs401681 C/T  | C/T | 576  | 1141 | 1717 |
| 28 | Pellatt AJ, 2013 | Colorectal cancer | Miscellany                | USA                     | Caucasian | Case-control study | TERT    | rs2736100 C/A | C/A | 2309 | 2915 | 5224 |
| 29 | Chen XF, 2012    | Lung cancer       | Miscellany NSCLC          | China                   | Asian     | Case-control study | CLPTM1L | rs402710 C/T  | C/T | 196  | 229  | 425  |
| 29 | Chen XF, 2012    | Lung cancer       | (Adenocarcinoma)          | China                   | Asian     | Case-control study | CLPTM1L | rs402710 C/T  | C/T | 96   | 229  | 325  |
| 29 | Chen XF, 2012    | Lung cancer       | Miscellany NSCLC          | China                   | Asian     | Case-control study | CLPTM1L | rs401681 C/T  | C/T | 196  | 229  | 425  |
| 29 | Chen XF, 2012    | Lung cancer       | (Adenocarcinoma) NSCLC    | China                   | Asian     | Case-control study | CLPTM1L | rs401681 C/T  | C/T | 96   | 229  | 325  |
| 29 | Chen XF, 2012    | Lung cancer       | (Squamous cell carcinoma) | China                   | Asian     | Case-control study | CLPTM1L | rs401681 C/T  | C/T | 44   | 229  | 273  |
| 29 | Chen XF, 2012    | Lung cancer       | Small cell carcinoma      | China                   | Asian     | Case-control study | CLPTM1L | rs401681 C/T  | C/T | 16   | 229  | 245  |
| 29 | Chen XF, 2012    | Lung cancer       | Miscellany NSCLC          | China                   | Asian     | Case-control study | TERT    | rs2736100 C/A | C/A | 196  | 229  | 425  |
| 29 | Chen XF, 2012    | Lung cancer       | (Adenocarcinoma) NSCLC    | China                   | Asian     | Case-control study | TERT    | rs2736100 C/A | C/A | 96   | 229  | 325  |
| 29 | Chen XF, 2012    | Lung cancer       | (Squamous cell carcinoma) | China                   | Asian     | Case-control study | TERT    | rs2736100 C/A | C/A | 44   | 229  | 273  |
| 30 | Bae EY, 2012     | Lung cancer       | Miscellany                | Korea                   | Asian     | Case-control study | TERT    | rs2736100 C/A | C/A | 1094 | 1000 | 2094 |
| 30 | Bae EY, 2012     | Lung cancer       | Miscellany                | Korea                   | Asian     | Case-control study | CLPTM1L | rs402710 C/T  | C/T | 1094 | 1000 | 2094 |
| 30 | Bae EY, 2012     | Lung cancer       | Miscellany                | Korea                   | Asian     | Case-control study | CLPTM1L | rs401681 C/T  | C/T | 1094 | 1000 | 2094 |

|    |                    |                   |                      |                     |           |                    |         |               |     |       |      |       |
|----|--------------------|-------------------|----------------------|---------------------|-----------|--------------------|---------|---------------|-----|-------|------|-------|
| 30 | Bae EY, 2012       | Lung cancer       | Miscellany           | Korea               | Asian     | Case-control study | CLPTM1L | rs31489 C/A   | C/A | 1094  | 1000 | 2094  |
| 31 | Ito H, 2012        | Lung cancer       | Miscellany           | Japan               | Asian     | Case-control study | TERT    | rs2736100 C/A | C/A | 716   | 716  | 1432  |
| 31 | Ito H, 2012        | Lung cancer       | Miscellany           | Japan               | Asian     | Case-control study | CLPTM1L | rs402710 C/T  | C/T | 716   | 716  | 1432  |
| 32 | Hofer P, 2012      | Colorectal cancer | Miscellany           | Austria             | Caucasian | Case-control study | TERT    | rs2736100 C/A | C/A | 142   | 1793 | 1935  |
| 33 | Ma ZC, 2013        | Bladder cancer    |                      | China               | Asian     | Case-control study | TERT    | rs2736100 C/A | C/A | 184   | 962  | 1146  |
| 33 | Ma ZC, 2013        | Bladder cancer    |                      | China               | Asian     | Case-control study | TERT    | rs2736098 C/T | C/T | 184   | 962  | 1146  |
| 33 | Ma ZC, 2013        | Bladder cancer    |                      | China               | Asian     | Case-control study | CLPTM1L | rs401681 C/T  | C/T | 184   | 962  | 1146  |
| 34 | Kinnersley B, 2012 | Colorectal cancer | Miscellany           | Austria             | Caucasian | GWAS               | TERT    | rs2736100 C/A | C/A | 379   | 1703 | 2082  |
| 34 | Kinnersley B, 2012 | Colorectal cancer | Miscellany           | USA                 | Caucasian | GWAS               | TERT    | rs2736100 C/A | C/A | 1175  | 999  | 2174  |
| 34 | Kinnersley B, 2012 | Colorectal cancer | Miscellany           | USA                 | Caucasian | GWAS               | TERT    | rs2736100 C/A | C/A | 796   | 2234 | 3030  |
| 34 | Kinnersley B, 2012 | Colorectal cancer | Miscellany           | Europe              | Caucasian | GWAS               | TERT    | rs2736100 C/A | C/A | 890   | 900  | 1790  |
| 34 | Kinnersley B, 2012 | Colorectal cancer | Miscellany           | Scotland            | Caucasian | GWAS               | TERT    | rs2736100 C/A | C/A | 973   | 998  | 1971  |
| 34 | Kinnersley B, 2012 | Colorectal cancer | Miscellany           | United Kingdom (UK) | Caucasian | GWAS               | TERT    | rs2736100 C/A | C/A | 1794  | 2686 | 4480  |
| 34 | Kinnersley B, 2012 | Colorectal cancer | Miscellany           | Europe              | Caucasian | Case-control study | TERT    | rs2736100 C/A | C/A | 10488 | 7137 | 17625 |
| 35 | Zagouri F, 2012    | Breast cancer     |                      | Greece              | Caucasian | Case-control study | TERT    | MNS16A L/S    | L/S | 113   | 124  | 237   |
| 36 | Wang H, 2013       | Lung cancer       | Miscellany           | China               | Asian     | Case-control study | CLPTM1L | rs401681 C/T  | C/T | 492   | 486  | 978   |
| 36 | Wang H, 2013       | Lung cancer       | NSCLC                | China               | Asian     | Case-control study | CLPTM1L | rs401681 C/T  | C/T | 393   | 486  | 879   |
| 36 | Wang H, 2013       | Lung cancer       | Small cell carcinoma | China               | Asian     | Case-control study | CLPTM1L | rs401681 C/T  | C/T | 99    | 486  | 585   |
| 37 | Zhao ZH, 2013      | Lung cancer       | Miscellany           | China               | Asian     | Case-control study | CLPTM1L | rs31489 C/A   | C/A | 784   | 782  | 1566  |

|    |                  |                          |                        |        |           |                           |         |                |     |      |      |      |
|----|------------------|--------------------------|------------------------|--------|-----------|---------------------------|---------|----------------|-----|------|------|------|
| 38 | Zhang C, 2013    | Hepatocellular carcinoma |                        | China  | Asian     | Case-control study        | TERT    | rs2736098 C/T  | C/T | 400  | 400  | 800  |
| 39 | Myneni AA, 2013  | Lung cancer              | Miscellany             | China  | Asian     | Case-control study        | TERT    | rs2736100 C/A  | C/A | 399  | 466  | 865  |
| 39 | Myneni AA, 2013  | Lung cancer              | Miscellany             | China  | Asian     | Case-control study        | CLPTM1L | rs401681 C/T   | C/T | 399  | 466  | 865  |
| 40 | Lan Q, 2013      | Lung cancer              | Miscellany             | China  | Asian     | Nested case-control study | TERT    | rs2736100 C/A  | C/A | 215  | 215  | 430  |
| 41 | Pellatt AJ, 2013 | Breast cancer            |                        | Poland | Caucasian | Case-control study        | TERT    | rs2736109 G/A  | G/A | 1995 | 2296 | 4291 |
| 41 | Pellatt AJ, 2013 | Breast cancer            |                        | Poland | Caucasian | Case-control study        | TERT    | rs2735940 A/G  | A/G | 1995 | 2296 | 4291 |
| 41 | Pellatt AJ, 2013 | Breast cancer            |                        | Poland | Caucasian | Case-control study        | TERT    | rs7712562 A/C  | A/C | 1995 | 2296 | 4291 |
| 41 | Pellatt AJ, 2013 | Breast cancer            |                        | Poland | Caucasian | Case-control study        | TERT    | rs2853669 T/C  | T/C | 1995 | 2296 | 4291 |
| 41 | Pellatt AJ, 2013 | Breast cancer            |                        | Poland | Caucasian | Case-control study        | TERT    | rs2736098 C/T  | C/T | 1995 | 2296 | 4291 |
| 41 | Pellatt AJ, 2013 | Breast cancer            |                        | Poland | Caucasian | Case-control study        | TERT    | rs2853677 G/A  | G/A | 1995 | 2296 | 4291 |
| 41 | Pellatt AJ, 2013 | Breast cancer            |                        | Poland | Caucasian | Case-control study        | TERT    | rs13167280 G/A | G/A | 1995 | 2296 | 4291 |
| 41 | Pellatt AJ, 2013 | Breast cancer            |                        | Poland | Caucasian | Case-control study        | TERT    | rs2075786 A/G  | A/G | 1995 | 2296 | 4291 |
| 41 | Pellatt AJ, 2013 | Breast cancer            |                        | Poland | Caucasian | Case-control study        | TERT    | rs2853690 G/T  | G/T | 1995 | 2296 | 4291 |
| 42 | Ke JT, 2013      | Lung cancer              | Miscellany             | China  | Asian     | Case-control study        | CLPTM1L | rs401681 C/T   | C/T | 611  | 1062 | 1673 |
| 42 | Ke JT, 2013      | Lung cancer              | NSCLC                  | China  | Asian     | Case-control study        | CLPTM1L | rs401681 C/T   | C/T | 427  | 1062 | 1489 |
| 43 | Li C, 2013       | Lung cancer              | Miscellany NSCLC       | China  | Asian     | Case-control study        | TERT    | rs2736098 C/T  | C/T | 501  | 576  | 1077 |
| 43 | Li C, 2013       | Lung cancer              | (Adenocarcinoma) NSCLC | China  | Asian     | Case-control study        | TERT    | rs2736098 C/T  | C/T | 334  | 576  | 910  |
| 43 | Li C, 2013       | Lung cancer              | (Squamous cell         | China  | Asian     | Case-control study        | TERT    | rs2736098 C/T  | C/T | 90   | 576  | 666  |

|    |                |                   |                                 |       |       |                    |              |               |     |     |     |      |
|----|----------------|-------------------|---------------------------------|-------|-------|--------------------|--------------|---------------|-----|-----|-----|------|
| 43 | Li C, 2013     | Lung cancer       | Miscellany<br>carcinoma)        | China | Asian | Case-control study | CLPTM1L      | rs401681 C/T  | C/T | 501 | 576 | 1077 |
| 43 | Li C, 2013     | Lung cancer       | (Adenocar<br>cinoma)<br>NSCLC   | China | Asian | Case-control study | CLPTM1L      | rs401681 C/T  | C/T | 334 | 576 | 910  |
| 43 | Li C, 2013     | Lung cancer       | (Squamous<br>cell<br>carcinoma) | China | Asian | Case-control study | CLPTM1L      | rs401681 C/T  | C/T | 90  | 576 | 666  |
| 44 | Lizuka T, 2013 | Gastric<br>cancer |                                 | Japan | Asian | Case-control study | TERT         | rs2735940 A/G | A/G | 177 | 591 | 768  |
| 44 | Lizuka T, 2013 | Breast<br>cancer  |                                 | Japan | Asian | Case-control study | TERT         | rs2735940 A/G | A/G | 68  | 591 | 659  |
| 45 | Jin TB, 2013   | Glioma            |                                 | China | Asian | Case-control study | TERT         | rs2853676 T/C | T/C | 433 | 463 | 896  |
| 46 | de Mello, 2013 | Lung cancer       | NSCLC                           | China | Asian | Case-control study | CLPTM1L      | rs31489 C/A   | C/A | 144 | 144 | 288  |
| 46 | de Mello, 2013 | Lung cancer       | NSCLC                           | China | Asian | Case-control study | CLPTM1L      | rs401681 C/T  | C/T | 144 | 144 | 288  |
| 46 | de Mello, 2013 | Lung cancer       | NSCLC                           | China | Asian | Case-control study | CLPTM1L      | rs402710 C/T  | C/T | 144 | 144 | 288  |
| 47 | Sun Y, 2013    | Lung cancer       | NSCLC                           | China | Asian | Case-control study | CLPTM1L      | rs401681 C/T  | C/T | 200 | 200 | 400  |
| 47 | Sun Y, 2013    | Lung cancer       | (Adenocar<br>cinoma)<br>NSCLC   | China | Asian | Case-control study | CLPTM1L      | rs401681 C/T  | C/T | 145 | 200 | 345  |
| 47 | Sun Y, 2013    | Lung cancer       | (Squamous<br>cell<br>carcinoma) | China | Asian | Case-control study | CLPTM1L      | rs401681 C/T  | C/T | 55  | 200 | 255  |
| 47 | Sun Y, 2013    | Lung cancer       | NSCLC                           | China | Asian | Case-control study | TERT/CLPTM1L | rs4975616 G/A | G/A | 200 | 200 | 400  |
| 47 | Sun Y, 2013    | Lung cancer       | (Adenocar<br>cinoma)<br>NSCLC   | China | Asian | Case-control study | CLPTM1L      | rs401681 C/T  | C/T | 145 | 200 | 345  |
| 47 | Sun Y, 2013    | Lung cancer       | (Squamous<br>cell<br>carcinoma) | China | Asian | Case-control study | CLPTM1L      | rs401681 C/T  | C/T | 55  | 200 | 255  |

|    |               |                      |                                 |       |       |                    |         |               |     |      |      |      |
|----|---------------|----------------------|---------------------------------|-------|-------|--------------------|---------|---------------|-----|------|------|------|
| 48 | Lu XZ, 2013   | Lung cancer          | Miscellany                      | China | Asian | Case-control study | CLPTM1L | rs402710 C/T  | C/T | 661  | 1062 | 1723 |
| 48 | Lu XZ, 2013   | Lung cancer          | Miscellany                      | China | Asian | Case-control study | CLPTM1L | rs402710 C/T  | C/T | 421  | 1062 | 1483 |
| 49 | Wu HJ, 2013   | Lung cancer          | Miscellany<br>NSCLC             | China | Asian | Case-control study | TERT    | rs2736098 C/T | C/T | 539  | 627  | 1166 |
| 49 | Wu HJ, 2013   | Lung cancer          | (Adenocar<br>cinoma)<br>NSCLC   | China | Asian | Case-control study | TERT    | rs2736098 C/T | C/T | 293  | 627  | 920  |
| 49 | Wu HJ, 2013   | Lung cancer          | (Squamous<br>cell<br>carcinoma) | China | Asian | Case-control study | TERT    | rs2736098 C/T | C/T | 246  | 627  | 873  |
| 50 | Jiang M, 2013 | Lung cancer          | Miscellany<br>Squamous          | China | Asian | Case-control study | CLPTM1L | rs401681 C/T  | C/T | 726  | 860  | 1586 |
| 50 | Jiang M, 2013 | Esophageal<br>cancer | cell<br>carcinoma               | China | Asian | Case-control study | CLPTM1L | rs401681 C/T  | C/T | 753  | 860  | 1613 |
| 51 | Wang FX, 2014 | Lung cancer          | Miscellany<br>NSCLC             | China | Asian | Case-control study | TERT    | rs2736100 C/A | C/A | 1552 | 1605 | 3157 |
| 51 | Wang FX, 2014 | Lung cancer          | (Adenocar<br>cinoma)<br>NSCLC   | China | Asian | Case-control study | TERT    | rs2736100 C/A | C/A | 746  | 1605 | 2351 |
| 51 | Wang FX, 2014 | Lung cancer          | (Squamous<br>cell<br>carcinoma) | China | Asian | Case-control study | TERT    | rs2736100 C/A | C/A | 596  | 1605 | 2201 |
| 52 | Liu CL, 2014  | Lung cancer          | Miscellany<br>NSCLC             | China | Asian | Case-control study | TERT    | rs2736098 C/T | C/T | 980  | 1000 | 1980 |
| 52 | Liu CL, 2014  | Lung cancer          | (Adenocar<br>cinoma)<br>NSCLC   | China | Asian | Case-control study | TERT    | rs2736098 C/T | C/T | 504  | 1000 | 1504 |
| 52 | Liu CL, 2014  | Lung cancer          | (Squamous<br>cell<br>carcinoma) | China | Asian | Case-control study | TERT    | rs2736098 C/T | C/T | 220  | 1000 | 1220 |
| 52 | Liu CL, 2014  | Lung cancer          | Miscellany<br>NSCLC             | China | Asian | Case-control study | CLPTM1L | rs401681 C/T  | C/T | 980  | 1000 | 1980 |
| 52 | Liu CL, 2014  | Lung cancer          | (Adenocar                       | China | Asian | Case-control study | CLPTM1L | rs401681 C/T  | C/T | 504  | 1000 | 1504 |

|    |                   |                                     |                                               |        |           |                    |              |               |     |     |      |      |
|----|-------------------|-------------------------------------|-----------------------------------------------|--------|-----------|--------------------|--------------|---------------|-----|-----|------|------|
| 52 | Liu CL, 2014      | Lung cancer                         | cinoma)<br>NSCLC<br>(Squamous cell carcinoma) | China  | Asian     | Case-control study | CLPTM1L      | rs401681 C/T  | C/T | 220 | 1000 | 1220 |
| 52 | Liu CL, 2014      | Lung cancer                         | Small cell carcinoma                          | China  | Asian     | Case-control study | CLPTM1L      | rs401681 C/T  | C/T | 140 | 1000 | 1140 |
| 53 | Zhang Y, 2014     | Lung cancer                         | Miscellany                                    | China  | Asian     | Case-control study | TERT         | rs2736098 C/T | C/T | 366 | 366  | 732  |
| 53 | Zhang Y, 2014     | Lung cancer                         | Miscellany                                    | China  | Asian     | Case-control study | CLPTM1L      | rs401681 C/T  | C/T | 366 | 366  | 732  |
| 54 | Yin J, 2014       | Esophageal cancer                   | Squamous cell carcinoma                       | China  | Asian     | Case-control study | CLPTM1L      | rs401681 C/T  | C/T | 629 | 686  | 1315 |
| 55 | Yin ZH, 2014      | Lung cancer                         | Miscellany                                    | China  | Asian     | Case-control study | TERT         | rs2736100 C/A | C/A | 524 | 524  | 1048 |
| 55 | Yin ZH, 2014      | Lung cancer                         | Miscellany                                    | China  | Asian     | Case-control study | TERT/CLPTM1L | rs4975616 G/A | G/A | 524 | 524  | 1048 |
| 56 | Liang YQ, 2014    | Lung cancer                         | Miscellany                                    | China  | Asian     | Case-control study | TERT/CLPTM1L | rs4975616 G/A | G/A | 309 | 310  | 619  |
| 56 | Liang YQ, 2014    | Lung cancer                         | Miscellany                                    | China  | Asian     | Case-control study | CLPTM1L      | rs402710 C/T  | C/T | 309 | 310  | 619  |
| 56 | Liang YQ, 2014    | Lung cancer                         | Miscellany                                    | China  | Asian     | Case-control study | CLPTM1L      | rs401681 C/T  | C/T | 309 | 310  | 619  |
| 57 | Jager R, 2014     | Myeloproliferative neoplasms (MPNs) | Miscellany                                    | Italy  | Caucasian | Case-control study | TERT         | rs2736100 C/A | C/A | 717 | 202  | 919  |
| 58 | Singh V, 2014     | Bladder cancer                      |                                               | India  | Others    | Cohort sytudy      | TERT         | rs2736098 C/T | C/T | 225 | 240  | 465  |
| 59 | Gao L, 2014       | Lung cancer                         | Miscellany                                    | China  | Asian     | Case-control study | TERT         | rs2242652 G/A | G/A | 309 | 310  | 619  |
| 59 | Gao L, 2014       | Lung cancer                         | Miscellany                                    | China  | Asian     | Case-control study | TERT         | rs2736098 C/T | C/T | 309 | 310  | 619  |
| 59 | Gao L, 2014       | Lung cancer                         | Miscellany                                    | China  | Asian     | Case-control study | TERT         | rs4246742 T/A | T/A | 309 | 310  | 619  |
| 60 | Shadrina AS, 2015 | Breast cancer                       |                                               | Russia | Caucasian | Case-control study | TERT         | rs2853669 T/C | T/C | 660 | 523  | 1183 |
| 60 | Shadrina AS, 2015 | Breast cancer                       |                                               | Russia | Caucasian | Case-control study | TERT         | rs2853669 T/C | T/C | 372 | 363  | 735  |
| 60 | Shadrina AS, 2015 | Breast cancer                       |                                               | Russia | Caucasian | Case-control study | TERT         | rs2736100 C/A | C/A | 660 | 523  | 1183 |

|    |                           |                          |            |                                                                           |           |                    |              |               |     |      |      |      |
|----|---------------------------|--------------------------|------------|---------------------------------------------------------------------------|-----------|--------------------|--------------|---------------|-----|------|------|------|
| 60 | Shadrina AS, 2015         | Breast cancer            |            | Russia                                                                    | Caucasian | Case-control study | TERT         | rs2736100 C/A | C/A | 372  | 363  | 735  |
| 61 | Su LY, 2014               | Hepatocellular carcinoma |            | China                                                                     | Asian     | Case-control study | TERT         | rs2736098 C/T | C/T | 201  | 210  | 411  |
| 62 | Zhang Y, 2014             | Bladder cancer           |            | China                                                                     | Asian     | Case-control study | CLPTM1L      | rs401681 C/T  | C/T | 367  | 420  | 787  |
| 63 | Luo X, 2014               | Lung cancer              | Miscellany | China                                                                     | Asian     | Case-control study | CLPTM1L      | rs31489 C/A   | C/A | 611  | 1062 | 1673 |
| 63 | Luo X, 2014               | Lung cancer              | NSCLC      | China                                                                     | Asian     | Case-control study | CLPTM1L      | rs31489 C/A   | C/A | 427  | 1062 | 1489 |
| 64 | Llorca-Cardenosa MJ, 2014 | Skin cancer              | melanoma   | Spain                                                                     | Caucasian | Case-control study | CLPTM1L      | rs401681 C/T  | C/T | 648  | 381  | 1029 |
| 64 | Llorca-Cardenosa MJ, 2014 | Skin cancer              | melanoma   | Spain                                                                     | Caucasian | Case-control study | CLPTM1L      | rs401681 C/T  | C/T | 322  | 352  | 674  |
| 65 | Hashemi M, 2014           | Breast cancer            |            | Iran                                                                      | Caucasian | Case-control study | TERT         | MNS16A L/S    | L/S | 266  | 225  | 491  |
| 65 | Hashemi M, 2014           | Breast cancer            |            | Iran                                                                      | Caucasian | Case-control study | TERT         | rs2736098 C/T | C/T | 266  | 225  | 491  |
| 65 | Hashemi M, 2014           | Breast cancer            |            | Iran                                                                      | Caucasian | Case-control study | TERT         | rs2735940 A/G | A/G | 266  | 225  | 491  |
| 66 | Xun XJ, 2014              | Lung cancer              | Miscellany | China                                                                     | Asian     | Case-control study | CLPTM1L      | rs401681 C/T  | C/T | 228  | 301  | 529  |
| 66 | Xun XJ, 2014              | Lung cancer              | Miscellany | China                                                                     | Asian     | Case-control study | CLPTM1L      | rs402710 C/T  | C/T | 228  | 301  | 529  |
| 67 | Campa D, 2015             | Pancreatic cancer        |            | Italy, Germany, Czech Republic, Greece, Lithuania, Poland, United Kingdom | Caucasian | Case-control study | CLPTM1L      | rs401681 C/T  | C/T | 1901 | 4106 | 6007 |
| 67 | Campa D, 2015             | Pancreatic cancer        |            | Italy, Germany, Czech Republic,                                           | Caucasian | Case-control study | TERT/CLPTM1L | rs4635969 G/A | G/A | 1901 | 4106 | 6007 |



|    |                      |                                               |                               |                                                         |           |                    |         |               |     |      |      |      |
|----|----------------------|-----------------------------------------------|-------------------------------|---------------------------------------------------------|-----------|--------------------|---------|---------------|-----|------|------|------|
|    |                      |                                               |                               | Greece,<br>Lithuania,<br>Poland,<br>United<br>Kingdom   |           |                    |         |               |     |      |      |      |
| 68 | Liu SG, 2015         | Lung cancer                                   | Miscellany                    | China                                                   | Asian     | Case-control study | CLPTM1L | rs402710 C/T  | C/T | 304  | 319  | 623  |
| 68 | Liu SG, 2015         | Lung cancer                                   | Miscellany                    | China                                                   | Asian     | Case-control study | CLPTM1L | rs401681 C/T  | C/T | 304  | 319  | 623  |
| 68 | Liu SG, 2015         | Lung cancer                                   | Miscellany                    | China                                                   | Asian     | Case-control study | CLPTM1L | rs465498 A/G  | A/G | 304  | 319  | 623  |
| 68 | Liu SG, 2015         | Lung cancer                                   | Miscellany                    | China                                                   | Asian     | Case-control study | TERT    | rs2736100 C/A | C/A | 304  | 319  | 623  |
|    |                      |                                               |                               | Sweden,<br>Denmark,<br>Norway<br>and<br>Switzerlan<br>d |           |                    |         |               |     |      |      |      |
| 69 | Fahmideh MA,<br>2015 | Glioma                                        |                               | Caucasian                                               |           | Case-control study | TERT    | rs2736100 C/A | C/A | 245  | 489  | 534  |
| 70 | Du JB, 2015          | Gastric<br>cancer                             |                               | China                                                   | Asian     | Case-control study | TERT    | rs2736100 C/A | C/A | 1136 | 1012 | 2148 |
| 71 | Wei RR, 2015         | Lung cancer                                   | NSCLC                         | China                                                   | Asian     | Case-control study | TERT    | rs2736100 C/A | C/A | 714  | 2520 | 3234 |
| 71 | Wei RR, 2015         | Lung cancer                                   | NSCLC                         | China                                                   | Asian     | Case-control study | TERT    | rs2736100 C/A | C/A | 296  | 2520 | 2816 |
| 71 | Wei RR, 2015         | Lung cancer                                   | NSCLC                         | China                                                   | Asian     | Case-control study | TERT    | rs2736100 C/A | C/A | 406  | 2520 | 2926 |
| 72 | Wang JQ, 2016        | Esophageal<br>cancer                          | Squamous<br>cell<br>carcinoma | China                                                   | Asian     | Case-control study | CLPTM1L | rs401681 C/T  | C/T | 360  | 310  | 670  |
| 73 | Choi BJ, 2015        | Gastric<br>cancer                             |                               | Korea                                                   | Asian     | Case-control study | TERT    | rs2736100 C/A | C/A | 243  | 246  | 489  |
| 74 | Weissfeld JL, 2015   | Lung cancer                                   | Miscellany                    | USA                                                     | Caucasian | Case-control study | TERT    | rs2736100 C/A | C/A | 778  | 1166 | 1944 |
| 75 | Yoo SS, 2015         | Lung cancer                                   | Miscellany                    | Korea                                                   | Asian     | Case-control study | TERT    | rs2736098 C/T | C/T | 1100 | 1096 | 2196 |
| 76 | Krahling T, 2016     | Myeloprolif<br>erative<br>neoplasms<br>(MPNs) | Miscellany                    | Hungary                                                 | Caucasian | Case-control study | TERT    | rs2736100 C/A | C/A | 584  | 400  | 984  |
| 76 | Krahling T, 2016     | Myeloprolif                                   | Polycythe                     | Hungary                                                 | Caucasian | Case-control study | TERT    | rs2736100 C/A | C/A | 209  | 400  | 609  |

|    |                   |                                     |                                |         |           |                    |         |               |     |      |      |      |
|----|-------------------|-------------------------------------|--------------------------------|---------|-----------|--------------------|---------|---------------|-----|------|------|------|
|    |                   | erative neoplasms (MPNs)            | mia vera (PV)                  |         |           |                    |         |               |     |      |      |      |
| 76 | Krahling T, 2016  | Myeloproliferative neoplasms (MPNs) | Essential thrombocythemia (ET) | Hungary | Caucasian | Case-control study | TERT    | rs2736100 C/A | C/A | 281  | 400  | 609  |
| 76 | Krahling T, 2016  | Myeloproliferative neoplasms (MPNs) | Primary myelofibrosis (PMF)    | Hungary | Caucasian | Case-control study | TERT    | rs2736100 C/A | C/A | 94   | 400  | 494  |
| 77 | Jannuzzi AT, 2015 | Colorectal cancer                   | Miscellany                     | Turkey  | Caucasian | Case-control study | TERT    | rs2736100 C/A | C/A | 104  | 135  | 239  |
| 78 | Zhou LQ, 2016     | Esophageal cancer                   | Squamous cell carcinoma        | China   | Asian     | Case-control study | TERT    | rs2853691 A/G | A/G | 588  | 600  | 1188 |
| 78 | Zhou LQ, 2016     | Esophageal cancer                   | Squamous cell carcinoma        | China   | Asian     | Case-control study | TERT    | rs2736100 C/A | C/A | 588  | 600  | 1188 |
| 78 | Zhou LQ, 2016     | Esophageal cancer                   | Squamous cell carcinoma        | China   | Asian     | Case-control study | CLPTM1L | rs451360 C/A  | C/A | 588  | 600  | 1188 |
| 78 | Zhou LQ, 2016     | Esophageal cancer                   | Squamous cell carcinoma        | China   | Asian     | Case-control study | TERT    | rs2853691 A/G | A/G | 1000 | 1000 | 2000 |
| 78 | Zhou LQ, 2016     | Esophageal cancer                   | Squamous cell carcinoma        | China   | Asian     | Case-control study | TERT    | rs2853691 A/G | A/G | 510  | 550  | 1060 |
| 78 | Zhou LQ, 2016     | Esophageal cancer                   | Squamous cell carcinoma        | China   | Asian     | Case-control study | TERT    | rs2736100 C/A | C/A | 1000 | 1000 | 2000 |
| 78 | Zhou LQ, 2016     | Esophageal cancer                   | Squamous cell                  | China   | Asian     | Case-control study | TERT    | rs2736100 C/A | C/A | 510  | 550  | 1060 |

|    |                |                                     |                                |                    |           |                    |         |               |     |      |      |      |
|----|----------------|-------------------------------------|--------------------------------|--------------------|-----------|--------------------|---------|---------------|-----|------|------|------|
| 78 | Zhou LQ, 2016  | Esophageal cancer                   | Squamous cell carcinoma        | China              | Asian     | Case-control study | CLPTM1L | rs451360 C/A  | C/A | 1000 | 1000 | 2000 |
| 78 | Zhou LQ, 2016  | Esophageal cancer                   | Squamous cell carcinoma        | China              | Asian     | Case-control study | CLPTM1L | rs451360 C/A  | C/A | 510  | 550  | 1060 |
| 79 | Jin TB, 2016   | Lung cancer                         | Miscellany                     | China              | Asian     | Case-control study | CLPTM1L | rs402710 C/T  | C/T | 554  | 696  | 1250 |
| 79 | Jin TB, 2016   | Lung cancer                         | Miscellany                     | China              | Asian     | Case-control study | CLPTM1L | rs401681 C/T  | C/T | 554  | 696  | 1250 |
| 80 | Bayram S, 2016 | Gastric cancer                      |                                | Turkey             | Caucasian | Case-control study | TERT    | rs2735940 A/G | A/G | 104  | 209  | 313  |
| 80 | Bayram S, 2016 | Gastric cancer                      |                                | Turkey             | Caucasian | Case-control study | TERT    | rs2736100 C/A | C/A | 104  | 209  | 313  |
| 81 | Trifa AP, 2016 | Myeloproliferative neoplasms (MPNs) | Miscellany                     | multiple countries | Caucasian | Case-control study | TERT    | rs2736100 C/A | C/A | 529  | 433  | 962  |
| 81 | Trifa AP, 2016 | Myeloproliferative neoplasms (MPNs) | Polycythemia vera (PV)         | multiple countries | Caucasian | Case-control study | TERT    | rs2736100 C/A | C/A | 184  | 433  | 617  |
| 81 | Trifa AP, 2016 | Myeloproliferative neoplasms (MPNs) | Essential thrombocythemia (ET) | multiple countries | Caucasian | Case-control study | TERT    | rs2736100 C/A | C/A | 271  | 433  | 704  |
| 81 | Trifa AP, 2016 | Myeloproliferative neoplasms (MPNs) | Primary myelofibrosis (PMF)    | multiple countries | Caucasian | Case-control study | TERT    | rs2736100 C/A | C/A | 74   | 433  | 507  |
| 82 | Xing YL, 2016  | Lung cancer                         | NSCLC                          | China              | Asian     | Case-control study | TERT    | rs2736100 C/A | C/A | 418  | 410  | 828  |
| 82 | Xing YL, 2016  | Lung cancer                         | NSCLC                          | China              | Asian     | Case-control study | TERT    | rs2853677 G/A | G/A | 418  | 410  | 828  |
| 83 | Wang X, 2016   | Lung cancer                         | Miscellany                     | China              | Asian     | Case-control study | TERT    | rs2736100 C/A | C/A | 500  | 500  | 1000 |
| 84 | Ge MH, 2016    | Thyroid                             | papillary                      | China              | Asian     | Case-control study | TERT    | rs2736100 C/A | C/A | 500  | 500  | 1000 |

|    |                   |                |                             |        |           |                    |      |               |     |      |      |      |
|----|-------------------|----------------|-----------------------------|--------|-----------|--------------------|------|---------------|-----|------|------|------|
|    |                   | cancer         | thyroid carcinoma           |        |           |                    |      |               |     |      |      |      |
| 84 | Ge MH, 2016       | Thyroid cancer | papillary thyroid carcinoma | China  | Asian     | Case-control study | TERT | rs2736100 C/A | C/A | 1000 | 1000 | 2000 |
| 84 | Ge MH, 2016       | Thyroid cancer | papillary thyroid carcinoma | China  | Asian     | Case-control study | TERT | rs2736100 C/A | C/A | 800  | 800  | 1600 |
| 85 | Li XT,2016        | Lung cancer    | Miscellany                  | China  | Asian     | Case-control study | TERT | rs2853677 G/A | G/A | 391  | 337  | 728  |
| 85 | Li XT,2016        | Lung cancer    | Miscellany                  | China  | Asian     | Case-control study | TERT | rs2736100 C/A | C/A | 391  | 337  | 728  |
| 86 | Oztas E, 2016     | Breast cancer  |                             | Turkey | Caucasian | Case-control study | TERT | rs2853669 T/C | T/C | 107  | 110  | 217  |
| 86 | Oztas E, 2016     | Breast cancer  |                             | Turkey | Caucasian | Case-control study | TERT | rs2736100 C/A | C/A | 107  | 110  | 217  |
| 86 | Oztas E, 2016     | Breast cancer  |                             | Turkey | Caucasian | Case-control study | TERT | rs2736098 C/T | C/T | 107  | 110  | 217  |
| 87 | Gong L, 2016      | Thyroid cancer |                             | China  | Asian     | Case-control study | TERT | rs2736100 C/A | C/A | 452  | 452  | 904  |
| 88 | Shiraishi K, 2016 | Lung cancer    | NSCLC (Adenocarcinoma)      | Japan  | Asian     | GWAS               | TERT | rs2736100 C/A | C/A | 663  | 4367 | 5030 |
| 88 | Shiraishi K, 2016 | Lung cancer    | NSCLC (Adenocarcinoma)      | Japan  | Asian     | Case-control study | TERT | rs2736100 C/A | C/A | 1748 | 6817 | 8565 |
| 88 | Shiraishi K, 2016 | Lung cancer    | NSCLC (Adenocarcinoma)      | Japan  | Asian     | Case-control study | TERT | rs2736100 C/A | C/A | 1315 | 3974 | 5289 |
| 88 | Shiraishi K, 2016 | Lung cancer    | NSCLC (Adenocarcinoma)      | Japan  | Asian     | GWAS               | TERT | rs2853677 G/A | G/A | 663  | 4367 | 5030 |
| 88 | Shiraishi K, 2016 | Lung cancer    | NSCLC (Adenocarcinoma)      | Japan  | Asian     | Case-control study | TERT | rs2853677 G/A | G/A | 1748 | 6817 | 8565 |

|    |                   |                                     |                           |        |           |                    |         |                   |     |      |       |       |
|----|-------------------|-------------------------------------|---------------------------|--------|-----------|--------------------|---------|-------------------|-----|------|-------|-------|
| 88 | Shiraishi K, 2016 | Lung cancer                         | NSCLC<br>(Adenocarcinoma) | Japan  | Asian     | Case-control study | TERT    | rs2853677 G/A     | G/A | 1315 | 3974  | 5289  |
| 89 | Dahlström J, 2016 | Myeloproliferative neoplasms (MPNs) | Miscellany                | China  | Asian     | Case-control study | TERT    | rs2736100 C/A     | C/A | 101  | 101   | 202   |
| 89 | Dahlström J, 2016 | Myeloproliferative neoplasms (MPNs) | Miscellany                | Sweden | Caucasian | Case-control study | TERT    | rs2736100 C/A     | C/A | 126  | 756   | 882   |
| 90 | Duan XL, 2016     | Gastric cancer                      |                           | China  | Asian     | Case-control study | TERT    | rs10069690<br>C/T | C/T | 302  | 300   | 605   |
| 90 | Duan XL, 2016     | Gastric cancer                      |                           | China  | Asian     | Case-control study | TERT    | rs2853676 T/C     | T/C | 302  | 300   | 605   |
| 91 | Dong J, 2017      | Lung cancer                         | NSCLC                     | China  | Asian     | Case-control study | TERT    | rs2736100 C/A     | C/A | 200  | 300   | 500   |
| 91 | Dong J, 2017      | Lung cancer                         | NSCLC                     | China  | Asian     | Case-control study | TERT    | rs2853677 G/A     | G/A | 200  | 300   | 500   |
| 91 | Dong J, 2017      | Lung cancer                         | NSCLC                     | China  | Asian     | Case-control study | CLPTM1L | rs401681 C/T      | C/T | 200  | 300   | 500   |
| 92 | Yuan XT, 2017     | Hepatocellular carcinoma            |                           | China  | Asian     | Case-control study | TERT    | rs2736098 C/T     | C/T | 245  | 257   | 502   |
| 93 | Zhang J, 2017     | Gastric cancer                      |                           | China  | Asian     | Case-control study | TERT    | rs2736100 C/A     | C/A | 360  | 728   | 1088  |
| 93 | Zhang J, 2017     | Gastric cancer                      |                           | China  | Asian     | Case-control study | TERT    | rs2735940 A/G     | A/G | 360  | 728   | 1088  |
| 94 | Xiao XY, 2017     | Lung cancer                         | Miscellany                | China  | Asian     | Case-control study | TERT    | rs2736098 C/T     | C/T | 214  | 216   | 430   |
| 94 | Xiao XY, 2017     | Lung cancer                         | Miscellany                | China  | Asian     | Case-control study | CLPTM1L | rs401681 C/T      | C/T | 214  | 216   | 430   |
| 95 | Chiang YH, 2017   | Myeloproliferative neoplasms (MPNs) | Miscellany                | China  | Asian     | Case-control study | TERT    | rs2736100 C/A     | C/A | 178  | 16946 | 17124 |
| 95 | Chiang YH, 2017   | Myeloproliferative neoplasms        | Polycythemia vera (PV)    | China  | Asian     | Case-control study | TERT    | rs2736100 C/A     | C/A | 54   | 16946 | 17000 |

|     |                       |                                                         |                                                  |        |           |                    |      |                   |     |     |       |       |
|-----|-----------------------|---------------------------------------------------------|--------------------------------------------------|--------|-----------|--------------------|------|-------------------|-----|-----|-------|-------|
| 95  | Chiang YH, 2017       | (MPNs)<br>Myeloprolif<br>erative<br>neoplasms<br>(MPNs) | Essential<br>thrombocyt<br>hemia (ET)            | China  | Asian     | Case-control study | TERT | rs2736100 C/A     | C/A | 109 | 16946 | 17055 |
| 95  | Chiang YH, 2017       | (MPNs)<br>Myeloprolif<br>erative<br>neoplasms<br>(MPNs) | Primary<br>myelofibro<br>sis (PMF)               | China  | Asian     | Case-control study | TERT | rs2736100 C/A     | C/A | 15  | 16946 | 16961 |
| 96  | Ye G, 2017            | Lung cancer                                             | Miscellany                                       | China  | Asian     | Case-control study | TERT | rs2242652 G/A     | G/A | 554 | 603   | 1157  |
| 96  | Ye G, 2017            | Lung cancer                                             | Miscellany                                       | China  | Asian     | Case-control study | TERT | rs2853677 G/A     | G/A | 554 | 603   | 1157  |
| 97  | Aydin M, 2018         | Breast<br>cancer                                        |                                                  | Turkey | Caucasian | Case-control study | TERT | rs2736109 G/A     | G/A | 123 | 122   | 245   |
| 97  | Aydin M, 2018         | Breast<br>cancer                                        |                                                  | Turkey | Caucasian | Case-control study | TERT | rs2735940 A/G     | A/G | 123 | 122   | 245   |
| 97  | Aydin M, 2018         | Breast<br>cancer                                        |                                                  | Turkey | Caucasian | Case-control study | TERT | rs2853669 T/C     | T/C | 123 | 122   | 245   |
| 97  | Aydin M, 2018         | Breast<br>cancer                                        |                                                  | Turkey | Caucasian | Case-control study | TERT | rs2736098 C/T     | C/T | 123 | 122   | 245   |
| 97  | Aydin M, 2018         | Breast<br>cancer                                        |                                                  | Turkey | Caucasian | Case-control study | TERT | rs2736100 C/A     | C/A | 123 | 122   | 245   |
| 98  | Li CY, 2018           | Lung cancer                                             | NSCLC                                            | China  | Asian     | Case-control study | TERT | rs2853677 G/A     | G/A | 467 | 526   | 993   |
| 99  | Bagherpour M,<br>2018 | Breast<br>cancer                                        |                                                  | Iran   | Caucasian | Case-control study | TERT | rs2736098 C/T     | C/T | 105 | 110   | 215   |
| 100 | Li Y, 2019            | Lung cancer                                             | NSCLC<br>(Adenocar<br>cinoma)                    | China  | Asian     | Case-control study | TERT | rs2853677 G/A     | G/A | 605 | 970   | 1575  |
| 101 | Zhang NS, 2019        | Gastric<br>cancer                                       | Gastric<br>cardia<br>adenocarci<br>noma<br>(GCA) | China  | Asian     | Case-control study | TERT | rs10069690<br>C/T | C/T | 584 | 568   | 1152  |
| 101 | Zhang NS, 2019        | Gastric                                                 | Gastric                                          | China  | Asian     | Case-control study | TERT | rs10069690        | C/T | 584 | 568   | 1152  |

|     |                      |                                     |                                                                    |       |        |                    |      | C/T           |     |     |     |     |
|-----|----------------------|-------------------------------------|--------------------------------------------------------------------|-------|--------|--------------------|------|---------------|-----|-----|-----|-----|
| 101 | Zhang NS, 2019       | Gastric cancer                      | cardia adenocarcinoma (GCA)<br>Gastric cardia adenocarcinoma (GCA) | China | Asian  | Case-control study | TERT | rs2853676 T/C | T/C | 440 | 500 | 940 |
| 101 | Zhang NS, 2019       | Gastric cancer                      | cardia adenocarcinoma (GCA)<br>Gastric cardia adenocarcinoma (GCA) | China | Asian  | Case-control study | TERT | rs2853676 T/C | T/C | 440 | 500 | 940 |
| 102 | Rasool Bhat Gh, 2019 | Lung cancer                         | Miscellany NSCLC                                                   | India | Others | Case-control study | TERT | rs2853677 G/A | G/A | 178 | 400 | 578 |
| 102 | Rasool Bhat Gh, 2019 | Lung cancer                         | (Adenocarcinoma)                                                   | India | Others | Case-control study | TERT | rs2853677 G/A | G/A | 112 | 400 | 512 |
| 103 | Matsuguma M, 2019    | Myeloproliferative neoplasms (MPNs) | Miscellany                                                         | Japan | Asian  | Case-control study | TERT | rs2736100 C/A | C/A | 201 | 366 | 567 |
| 103 | Matsuguma M, 2019    | Myeloproliferative neoplasms (MPNs) | Polycythemia vera (PV)                                             | Japan | Asian  | Case-control study | TERT | rs2736100 C/A | C/A | 52  | 366 | 418 |
| 103 | Matsuguma M, 2019    | Myeloproliferative neoplasms (MPNs) | Essential thrombocythemia (ET)                                     | Japan | Asian  | Case-control study | TERT | rs2736100 C/A | C/A | 131 | 366 | 497 |
| 103 | Matsuguma M, 2019    | Myeloproliferative                  | Primary myelofibro                                                 | Japan | Asian  | Case-control study | TERT | rs2736100 C/A | C/A | 18  | 366 | 384 |

|     |                          |                                |            |       |         |                    |              |                   |     |      |      |      |
|-----|--------------------------|--------------------------------|------------|-------|---------|--------------------|--------------|-------------------|-----|------|------|------|
|     |                          | neoplasms<br>(MPNs)            | sis (PMF)  |       |         |                    |              |                   |     |      |      |      |
| 104 | Yoo SS, 2020             | Lung cancer                    | Miscellany | Korea | Asian   | Case-control study | TERT/CLPTM1L | rs4975616 G/A     | G/A | 714  | 626  | 1340 |
|     |                          | Idiopathic                     |            |       |         |                    |              |                   |     |      |      |      |
| 105 | Arimura-Omori M,<br>2020 | pulmonary<br>fibrosis<br>(IPF) |            | Japan | Asian   | Case-control study | TERT         | rs2736100 C/A     | C/A | 155  | 379  | 534  |
| 106 | Ma LL, 2020              | Gastric<br>cancer              |            | China | Asian   | Case-control study | TERT         | rs10069690<br>C/T | C/T | 1000 | 1100 | 2100 |
| 106 | Ma LL, 2020              | Gastric<br>cancer              |            | China | Asian   | Case-control study | TERT         | rs2853676 T/C     | T/C | 1000 | 1100 | 2100 |
| 107 | Pandith AA, 2020         | Glioma                         |            | India | Others  | Case-control study | TERT         | rs2736100 C/A     | C/A | 106  | 210  | 316  |
| 108 | Mandour I, 2020          | Lung cancer                    | Miscellany | Egypt | African | Case-control study | TERT         | rs2736100 C/A     | C/A | 40   | 40   | 80   |
| 109 | Wang HJ, 2016            | Lung cancer                    | Miscellany | China | Asian   | Case-control study | TERT         | rs4246742 T/A     | T/A | 228  | 310  | 538  |
| 109 | Wang HJ, 2016            | Lung cancer                    | Miscellany | China | Asian   | Case-control study | TERT         | rs2736098 C/T     | C/T | 228  | 310  | 538  |

Note: A, adenine; C, cytosine; G, guanine; T, thymine; GWAS: genome-wide association studies; NSCLC: non-small cell lung cancer.



## References:

1. Savage SA, Chanock SJ, Lissowska J, Brinton LA, Richesson D, Peplonska B, et al. Genetic variation in five genes important in telomere biology and risk for breast cancer. *Br J Cancer*. 2007 Sep 17;97(6):832-6.
2. Wang Y, Hu ZB, Liang J, Wang ZW, Tang JH, Wang S, et al. A tandem repeat of human telomerase reverse transcriptase (hTERT) and risk of breast cancer development and metastasis in Chinese women. *Carcinogenesis*. 2008 Jun;29(6):1197-201.
3. Mushiroda T, Wattanapokayakit S, Takahashi A, Nukiwa T, Kudoh S, Ogura T, et al. A genome-wide association study identifies an association of a common variant in TERT with susceptibility to idiopathic pulmonary fibrosis. *J Med Genet*. 2008 Oct;45(10):654-6.
4. Wang YF, Broderick P, Webb E, Wu XF, Vijaykrishnan J, Matakidou A, et al. Common 5p15.33 and 6p21.33 variants influence lung cancer risk. *Nat Genet*. 2008 Dec;40(12):1407-9.
5. Jin GF, Xu L, Shu YQ, Tian T, Liang J, Xu Y, et al. Common genetic variants on 5p15.33 contribute to risk of lung adenocarcinoma in a Chinese population. *Carcinogenesis*. 2009 Jun;30(6):987-90.
6. Varadi V, Brendle A, Grzybowska E, Johansson R, Enquist E, Butkiewicz D, et al. A functional promoter polymorphism in the TERT gene does not affect inherited susceptibility to breast cancer. *Cancer Genet Cytogenet*. 2009 Apr 15;190(2):71-4.
7. Zienolddiny S, Skaug V, Landvik NE, Ryberg D, Phillips DH, Houlston R, et al. The TERT-CLPTM1L lung cancer susceptibility variant associates with higher DNA adduct formation in the lung. *Carcinogenesis*. 2009 Aug;30(8):1368-71.
8. Shete S, Hosking FJ, Robertson LB, Dobbins SE, Sanson M, Malmer B, et al. Genome-wide association study identifies five susceptibility loci for glioma. *Nat Genet*. 2009 Aug;41(8):899-904.
9. Broderick P, Wang YF, Vijaykrishnan J, Matakidou A, Spitz MR, Eisen T, et al. Deciphering the impact of common genetic variation on lung cancer risk: a genome-wide association study. *Cancer Res*. 2009 Aug 15;69(16):6633-41.
10. Varadi V, Brendle A, Brandt A, Johansson R, Enquist K, Henriksson R, et al. Polymorphisms in telomere-associated genes, breast cancer susceptibility and prognosis. *Eur J Cancer*. 2009 Nov;45(17):3008-16.
11. Choi JE, Kang HG, Jang JS, Choi YY, Kim MJ, Kim JS, et al. Polymorphisms in telomere maintenance genes and risk of lung cancer. *Cancer Epidemiol Biomarkers Prev*. 2009 Oct;18(10):2773-81.
12. Landi MT, Chatterjee N, Yu K, Goldin LR, Goldstein AM, Rotunno M, et al. A genome-wide association study of lung cancer identifies a region of chromosome 5p15 associated with risk for adenocarcinoma. *Am J Hum Genet*. 2009 Nov;85(5):679-91.
13. Wang YF, Broderick P, Matakidou A, Eisen T, Houlston TS. Role of 5p15.33 (TERT-CLPTM1L), 6p21.33 and 15q25.1 (CHRNA5-CHRNA3) variation and lung cancer risk in never-smokers. *Carcinogenesis*. 2010 Feb;31(2):234-8.
14. Shen J, Gammon MD, Wu HC, Terry MB, Wang Q, Bradshaw PT, et al. Multiple genetic variants in telomere pathway genes and breast cancer risk. *Cancer Epidemiol Biomarkers Prev*. 2010 Jan; 19(1):219-28.
15. Truong T, Hung RJ, Amos CI, Wu XF, Bickeböller H, Rosenberger A, et al. Replication of lung cancer susceptibility loci at chromosomes 15q25, 5p15, and 6p21: a pooled analysis from the International Lung Cancer Consortium. *J Natl Cancer Inst*. 2010 Jul 7;102(13):959-71.
16. Hsiung CA, Lan Q, Hong YC, Chen CJ, Hosgood HD, Chang IS, et al. The 5p15.33 locus is associated with risk of lung adenocarcinoma in never-smoking females in Asia. *PLoS Genet*. 2010 Aug 5;6(8):e1001051.
17. Miki D, Kubo M, Takahashi A, Yoon KA, Kim J, Lee KL, et al. Variation in TP63 is associated with lung adenocarcinoma susceptibility in Japanese and Korean populations. *Nat Genet*. 2010 Oct;42(10):893-6.
18. Yoon KA, Park JH, Han J, Park S, Lee GK, Han JY, et al. A genome-wide association study reveals susceptibility variants for non-small cell lung cancer in the Korean population. *Hum Mol Genet*. 2010 Dec 15;19(24):4948-54.
19. Manuela Gago-Dominguez I, Xuejuan Jiang, David V Conti, Jose Esteban Castelao, Mariana C Stern, Victoria K Cortessis, et al. Genetic variations on chromosomes 5p15 and 15q25 and bladder cancer risk: findings from the Los Angeles-Shanghai bladder case-control study. *Carcinogenesis*. 2011 Feb;32(2):197-202.
20. Nan HM, Qureshi AA, Prescott J, Vivo ID, Han JL, et al. Genetic variants in telomere-maintaining genes and skin cancer risk. *Hum Genet*. 2011 Mar;129(3):247-53.

21. Chen HY, Chen YY, Zhao Y, Fan WW, Zhou KK, Liu YH, et al. Association of sequence variants on chromosomes 20, 11, and 5 (20q13.33, 11q23.3, and 5p15.33) with glioma susceptibility in a Chinese population. *Am J Epidemiol*. 2011 Apr 15;173(8):915-22.
22. Kohno T, Kunitoh H, Mimaki S, Shiraiishi K, Kuchiba A, Yamamoto S, et al. Contribution of the TP53, OGG1, CHRNA3, and HLA-DQA1 genes to the risk for lung squamous cell carcinoma. *J Thorac Oncol*. 2011 Apr;6(4):813-7.
23. Hu Z, Wu C, Shi YY, Guo H, Zhao XY, Yin ZH, et al. A genome-wide association study identifies two new lung cancer susceptibility loci at 13q12.12 and 22q12.2 in Han Chinese. *Nat Genet*. 2011 Jul 3;43(8):792-6.
24. Pande M, Spitz MR, Wu XF, Gorlov IP, Chen WV, Amos CI, et al. Novel genetic variants in the chromosome 5p15.33 region associate with lung cancer risk. *Carcinogenesis*. 2011 Oct;32(10):1493-9.
25. Beesley J, Pickett HA, Johnatty SE, Dunning AM, Chen XQ, Jun Li, et al. Functional polymorphisms in the TERT promoter are associated with risk of serous epithelial ovarian and breast cancers. *PLoS One*. 2011;6(9):e24987.
26. Jaworowska E, Trubicka J, Lener MR, Masojć B, Złowocka-Perłowska E, McKay JD, et al. Smoking related cancers and loci at chromosomes 15q25, 5p15, 6p22.1 and 6p21.33 in the Polish population. *PLoS One*. 2011;6(9):e25057.
27. Rizzato C, Campa D, Giese N, Werner J, Rachakonda PS, Kumar R, et al. Pancreatic cancer susceptibility loci and their role in survival. *PLoS One*. 2011;6(11):e27921.
28. Pellatt AJ, Wolff RK, Herrick J, Lundgreen A, Slattery ML. TERT's role in colorectal carcinogenesis. *Mol Carcinog*. 2013 Jul;52(7):507-13.
29. Chen XF, Cai S, Chen QG, Ni ZH, Tang JH, Xu DW, et al. Multiple variants of TERT and CLPTM1L constitute risk factors for lung adenocarcinoma. *Genet Mol Res*. 2012 Feb 16;11(1):370-8.
30. Bae EY, Lee SY, Kang BK, Lee EJ, Choi YY, Kang HG, et al. Replication of results of genome-wide association studies on lung cancer susceptibility loci in a Korean population. *Respirology*. 2012 May;17(4):699-706.
31. Ito H, McKay JD, Hosono S, Hida T, Yatabe Y, Mitsudomi T, et al. Association between a genome-wide association study-identified locus and the risk of lung cancer in Japanese population. *J Thorac Oncol*. 2012 May;7(5):790-8.
32. Hofer P, Baierl A, Bernhart K, Leeb G, Mach K, Micksche M, et al. Association of genetic variants of human telomerase with colorectal polyps and colorectal cancer risk. *Mol Carcinog*. 2012 Oct;51 Suppl 1:E176-82.
33. Ma ZC, Hu QF, Chen Z, Tao S, Macnamara L, Kim ST, et al. Systematic evaluation of bladder cancer risk-associated single-nucleotide polymorphisms in a Chinese population. *Mol Carcinog*. 2013 Nov;52(11):916-21.
34. Kinnersley B, Migliorini G, Broderick P, Whiffin N, Dobbins SE, Casey G, et al. The TERT variant rs2736100 is associated with colorectal cancer risk. *Br J Cancer*. 2012 Sep 4;107(6):1001-8.
35. Zagouri F, Sergentanis TN, Gazouli M, Tsigginou A, Dimitrakakis C, Eleutherakis-Papaiakovou E, et al. HTERT MNS16A polymorphism in breast cancer: a case-control study. *Mol Biol Rep*. 2012 Dec;39(12):10859-63.
36. Wang H, Zhao Y, Ma J, Zhang G, Mu Y, Qi G, et al. The genetic variant rs401681C/T is associated with the risk of non-small cell lung cancer in a Chinese mainland population. *Genet Mol Res*. 2013 Jan 22;12(1):67-73.
37. Zhao ZH, Li C, Yang LX, Zhang XB, Zhao XY, Song X, et al. Significant association of 5p15.33 (TERT-CLPTM1L genes) with lung cancer in Chinese Han population. *Exp Lung Res*. 2013 Mar;39(2):91-8.
38. Zhang C, Tian YP, Wang Y, Guo FH, Qin JF, Ni H. hTERT rs2736098 genetic variants and susceptibility of hepatocellular carcinoma in the Chinese population: a case-control study. *Hepatobiliary Pancreat Dis Int*. 2013 Feb;12(1):74-9.
39. Myneni AA, Chang SC, Niu RH, Liu L, Ochs-Balcom HM, Li Y, et al. Genetic polymorphisms of TERT and CLPTM1L and risk of lung cancer--a case-control study in a Chinese population. *Lung Cancer*. 2013 May;80(2):131-7.

40. Lan Q, Cawthon R, Gao YT, Hu W, Hosgood 3rd HD, Barone-Adesi F, et al. Longer telomere length in peripheral white blood cells is associated with risk of lung cancer and the rs2736100 (CLPTM1L-TERT) polymorphism in a prospective cohort study among women in China. *PLoS One*. 2013;8(3):e59230.
41. Pellatt AJ, Wolff RK, Torres-Mejia G, John EM, Herrick JS, Lundgreen A, et al. Telomere length, telomere-related genes, and breast cancer risk: the breast cancer health disparities study. *Genes Chromosomes Cancer*. 2013 Jul;52(7):595-609.
42. Ke JT, Zhong R, Zhang T, Liu LF, Rui R, Shen N, et al. Replication study in Chinese population and meta-analysis supports association of the 5p15.33 locus with lung cancer. *PLoS One*. 2013 Apr 30;8(4):e62485.
43. Li C, Yin YH, Wu W, Li XL, Ren YW, Zhou B. Genetic variations in TERT-CLPTM1L genes and risk of lung cancer in Chinese women nonsmokers. *PLoS One*. 2013 May 30;8(5):e64988.
44. Iizuka T, Sawabe T, Takubo K, Liu M, Homma Y, Suzuki M, et al. hTERT promoter polymorphism, -1327C>T, is associated with the risk of epithelial cancer. *Springerplus*. 2013 May 31;2(1):249.
45. Jin TB, Zhang JY, Li G, Du SL, Geng TT, Gao J, et al. RTEL1 and TERT polymorphisms are associated with astrocytoma risk in the Chinese Han population. *Tumour Biol*. 2013 Dec;34(6):3659-66.
46. de Mello RA, Ferreira M, Soares-Pires F, Costa S, Cunha J, Oliveira P, et al. The impact of polymorphic variations in the 5p15, 6p12, 6p21 and 15q25 Loci on the risk and prognosis of portuguese patients with non-small cell lung cancer. *PLoS One*. 2013 Sep 6;8(9):e72373.
47. Sun Y, Zhang YJ, Kong XM. No association of XRCC1 and CLPTM1L polymorphisms with non-small cell lung cancer in a non-smoking Han Chinese population. *Asian Pac J Cancer Prev*. 2013;14(9):5171-4.
48. Lu XZ, Ke JT, Luo X, Zhu YW, Zou L, Li HJ, et al. The SNP rs402710 in 5p15.33 is associated with lung cancer risk: a replication study in Chinese population and a meta-analysis. *PLoS One*. 2013 Oct 23;8(10):e76252.
49. Wu HJ, Qiao NA, Wang Y, Jiang M, Wang SK, Wang, CH et al. Association between the telomerase reverse transcriptase (TERT) rs2736098 polymorphism and cancer risk: evidence from a case-control study of non-small-cell lung cancer and a meta-analysis. *PLoS One*. 2013 Nov 19;8(11):e76372.
50. Jiang M, Wu HJ, Qin CY. Genetic variant rs401681 at 5p15.33 modifies susceptibility to lung cancer but not esophageal squamous cell carcinoma. *PLoS One*. 2013 Dec 30;8(12):e84277.
51. Wang FX, Fu P, Pang YX, Liu CX, Shao ZL, Zhu JY, et al. TERT rs2736100T/G polymorphism upregulates interleukin 6 expression in non-small cell lung cancer especially in adenocarcinoma. *Tumour Biol*. 2014 May;35(5):4667-72.
52. Liu CL, Wang YJ, Huang H, Wang C, Zhang H, Kong YL, et al. Association between CLPTM1L-TERT rs401681 polymorphism and pancreatic cancer risk among Chinese Han population. *Tumour Biol*. 2014 Jun;35(6):5453-7.
53. Zhang Y, Zhao MM, Shen L, Ren YW, Su LY, Li XL, et al. Genetic polymorphisms of TERT and CLPTM1L and risk of lung cancer: a case-control study in northeast Chinese male population. *Med Oncol*. 2014 Jul;31(7):18.
54. Yin J, Wang LM, Zheng L, Wang X, Shi YJ, Shao AZ, et al. TERT-CLPTM1L Rs401681 C>T polymorphism was associated with a decreased risk of esophageal cancer in a Chinese population. *PLoS One*. 2014 Jul 9;9(7):e100667.
55. Yin ZH, Cui ZG, Ren YW, Zhang HB, Yan Y, Zhao YX, et al. Genetic polymorphisms of TERT and CLPTM1L, cooking oil fume exposure, and risk of lung cancer: a case-control study in a Chinese non-smoking female population. *Med Oncol*. 2014 Aug;31(8):114.
56. Liang YQ, Thakur A, Gao L, Wang T, Zhang S, Ren H, et al. Correlation of CLPTM1L polymorphisms with lung cancer susceptibility and response to cisplatin-based chemotherapy in a Chinese Han population. *Tumour Biol*. 2014 Dec;35(12):12075-82.
57. Jäger R, Harutyunyan AS, Rumi E, Pietra D, Berg T, Olcaydu D, et al. Common germline variation at the TERT locus contributes to familial clustering of myeloproliferative neoplasms. *Am J Hematol*. 2014 Dec;89(12):1107-10.
58. Singh V, Jaiswal PK, Mittal RD. Replicative study of GWAS TP63C/T, TERTC/T, and SLC14A1C/T with susceptibility to bladder cancer in North Indians. *Urol Oncol*. 2014 Nov;32(8):1209-14.

59. Gao L, Thakur A, Liang YQ, Zhang S, Wang T, Chen TJ, et al. Polymorphisms in the TERT gene are associated with lung cancer risk in the Chinese Han population. *Eur J Cancer Prev.* 2014 Nov;23(6):497-501.
60. Shadrina AS, Boyarskikh UA, Oskina NA, Sinkina TV, Lazarev AF, Petrova VD, et al. TERT polymorphisms rs2853669 and rs7726159 influence on prostate cancer risk in Russian population. *Tumour Biol.* 2015 Feb;36(2):841-7.
61. Su LY, Li XL, Shen L, Zhang Y, Zhao MM, Yin ZH, et al. Polymorphisms of TERT and CLPTM1L and the risk of hepatocellular carcinoma in Chinese males. *Asian Pac J Cancer Prev.* 2014;15(19):8197-201
62. Zhang Y, Sun Y, Chen T, Hu HL, Xie WQ, Qiao ZH, et al. Genetic variations rs11892031 and rs401681 are associated with bladder cancer risk in a Chinese population. *Int J Mol Sci.* 2014 Oct 24;15(11):19330-41.
63. Luo X, Lamsal LP, Xu WJ, Lu J, Lu YJ, Shen Y, et al. Genetic variant in CLPTM1L confers reduced risk of lung cancer: a replication study in Chinese and a meta-analysis. *Asian Pac J Cancer Prev.* 2014;15(21):9241-7.
64. Llorca-Cardeñosa MJ, Peña-Chilet M, Mayor M, Gomez-Fernandez G, Casado B, Martin-Gonzalez M, et al. Long telomere length and a TERT-CLPTM1 locus polymorphism association with melanoma risk. *Eur J Cancer.* 2014 Dec;50(18):3168-77.
65. Hashemi M, Amininia S, Ebrahimi M, Hashemi SM, Taheri M, Ghavami S. Association between hTERT polymorphisms and the risk of breast cancer in a sample of Southeast Iranian population. *BMC Res Notes.* 2014 Dec 10;7:895.
66. Xun XJ, Wang HJ, Yang H, Wang H, Wang B, Kang LL, et al. CLPTM1L genetic polymorphisms and interaction with smoking and alcohol drinking in lung cancer risk: a case-control study in the Han population from northwest China. *Medicine (Baltimore).* 2014 Dec;93(28):e289.
67. Campa D, Rizzato C, Stolzenberg-Solomon R, Pacetti P, Vodicka P, Cleary SP, et al. TERT gene harbors multiple variants associated with pancreatic cancer susceptibility. *Int J Cancer.* 2015 Nov 1;137(9):2175-83.
68. Liu SG, Ma L, Cen QH, Huang JS, Zhang JX, Zhang JJ. Association of genetic polymorphisms in TERT-CLPTM1L with lung cancer in a Chinese population. *Genet Mol Res.* 2015 May 4;14(2):4469-76.
69. Fahmideh MA, Lavebratt C, Schüz J, Rööslö M, Tynes T, Grotzer MA, et al. CCDC26, CDKN2BAS, RTEL1 and TERT Polymorphisms in pediatric brain tumor susceptibility. *Carcinogenesis.* 2015 Aug;36(8):876-82.
70. Du JB, Zhu X, Xie CW, Dai NB, Gu YY, Zhu M, et al. Telomere length, genetic variants and gastric cancer risk in a Chinese population. *Carcinogenesis.* 2015 Sep;36(9):963-70.
71. Wei RR, Cao L, Pu HY, Wang HW, Zheng YL, Niu XM, et al. TERT Polymorphism rs2736100-C Is Associated with EGFR Mutation-Positive Non-Small Cell Lung Cancer. *Clin Cancer Res.* 2015 Nov 15;21(22):5173-5180.
72. Wang JQ, Zhang BP, Yang Z, Zhou L, Geng TT, Li HP, et al. Association of gastrointestinal gland cancer susceptibility loci with esophageal carcinoma among the Chinese Han population: a case-control study. *Tumour Biol.* 2016 Feb;37(2):1627-33.
73. Choi BJ, Yoon JH, Kim O, Choi WS, Nam SW, Lee JY, et al. Influence of the hTERT rs2736100 polymorphism on telomere length in gastric cancer. *World J Gastroenterol.* 2015 Aug 21;21(31):9328-36.
74. Weissfeld JL, Lin Y, Lin HM, Kurland BF, Wilson DO, Fuhrman CR, et al. Lung Cancer Risk Prediction Using Common SNPs Located in GWAS-Identified Susceptibility Regions. *J Thorac Oncol.* 2015 Nov;10(11):1538-45.
75. Yoo SS, Do SK, Choi JE, Lee SY, Lee J, Cha SI, et al. TERT Polymorphism rs2853669 Influences on Lung Cancer Risk in the Korean Population. *J Korean Med Sci.* 2015 Oct;30(10):1423-8.
76. Krahling T, Balassa K, Kiss KP, Bors A, Batai A, Halm G, et al. Co-occurrence of Myeloproliferative Neoplasms and Solid Tumors Is Attributed to a Synergism Between Cytoreductive Therapy and the Common TERT Polymorphism rs2736100. *Cancer Epidemiol Biomarkers Prev.* 2016 Jan;25(1):98-104.
77. Jannuzzi AT, Karaman E, Oztas E, Yanar HT, Özhan G. Telomerase Reverse Transcriptase (TERT) Gene Variations and Susceptibility of Colorectal Cancer. *Genet Test Mol Biomarkers.* 2015 Dec;19(12):692-7.
78. Zhou LQ, Fu GB, Wei JY, Shi J, Pan WT, Ren YL, et al. The identification of two regulatory ESCC susceptibility genetic variants in the TERT-CLPTM1L loci. *Oncotarget.* 2016 Feb 2;7(5):5495-506.

79. Jin TB, Li B, He N, Zhang Y, Xia RD, Kang LI, et al. CLPTM1L polymorphism as a protective factor for lung cancer: a case-control study in southern Chinese population. *Tumour Biol.* 2016 Aug;37(8):10533-8.
80. Bayram S, Ülger Y, Sümbül AT, Kaya BY, Genç A, Rencüzoğullari E, et al. Polymorphisms in human telomerase reverse transcriptase (hTERT) gene and susceptibility to gastric cancer in a Turkish population: Hospital-based case-control study. *Gene.* 2016 Jul 1;585(1):84-92.
81. Trifa AP, Bănescu C, Tevet M, Bojan A, Dima D, Urian L, et al. TERT rs2736100 A>C SNP and JAK2 46/1 haplotype significantly contribute to the occurrence of JAK2 V617F and CALR mutated myeloproliferative neoplasms - a multicentric study on 529 patients. *Br J Haematol.* 2016 Jul;174(2):218-26.
82. Xing YL, Liu F, Li JF, Lin JC, Zhu GD, Li M, et al. Case-Control Study on Impact of the Telomerase Reverse Transcriptase Gene Polymorphism and Additional Single Nucleotide Polymorphism (SNP)- SNP Interaction on Non-Small Cell Lung Cancers Risk in Chinese Han Population. *J Clin Lab Anal.* 2016 Nov;30(6):1071-1077.
83. Wang X, Ma KW, Chi LM, Cui JW, Jin LN, Hu JF, et al. Combining Telomerase Reverse Transcriptase Genetic Variant rs2736100 with Epidemiologic Factors in the Prediction of Lung Cancer Susceptibility. *J Cancer.* 2016 Apr 28;7(7):846-53.
84. Ge MH, Shi M, An CM, Yang WJ, Nie XL, Zhang J, et al. Functional evaluation of TERT-CLPTM1L genetic variants associated with susceptibility of papillary thyroid carcinoma. *Sci Rep.* 2016 May 17;6:26037.
85. Li XT, Xu X, Fang JL, Wang L, Mu YC, Zhang P, et al. Rs2853677 modulates Snail1 binding to the TERT enhancer and affects lung adenocarcinoma susceptibility. *Oncotarget.* 2016 Jun 21;7(25):37825-37838.
86. Oztas E, Kara H, Kara ZP, Aydogan MU, Uras C, Ozhan G. Association Between Human Telomerase Reverse Transcriptase Gene Variations and Risk of Developing Breast Cancer. *Genet Test Mol Biomarkers.* 2016 Aug;20(8):459-64.
87. Gong L, Xu Y, Hu YQ, Ding QJ, Yi CH, Huang W, et al. hTERT gene polymorphism correlates with the risk and the prognosis of thyroid cancer. *Cancer Biomark.* 2016 Jul 8;17(2):195-204.
88. Shiraishi K, Okada Y, Takahashi A, Kamatani Y, Momozawa Y, Ashikawa K, et al. Association of variations in HLA class II and other loci with susceptibility to EGFR-mutated lung adenocarcinoma. *Nat Commun.* 2016 Aug 9;7:12451
89. Dahlström J, Liu TT, Yuan XT, Saft L, Ghaderi M, Wei YB, et al. TERT rs2736100 genotypes are associated with differential risk of myeloproliferative neoplasms in Swedish and Chinese male patient populations. *Ann Hematol.* 2016 Oct;95(11):1825-32
90. Duan XL, Cao W, Wang LJ, Liu SD, Liu Z, Zhang BL, et al. Genetic variants in TERT are associated with risk of gastric cancer in a Chinese Han population. *Oncotarget.* 2016 Dec 13;7(50):82727-82732.
91. Dong J, Cheng Y, Zhu M, Wen Y, Wang C, Wang YZ, et al. Fine mapping of chromosome 5p15.33 identifies novel lung cancer susceptibility loci in Han Chinese. *Int J Cancer.* 2017 Aug 1;141(3):447-456.
92. Yuan XT, Cheng GH, Yu JY, Zheng SZ, Sun C, Sun Q, et al. The TERT promoter mutation incidence is modified by germline TERT rs2736098 and rs2736100 polymorphisms in hepatocellular carcinoma. *Oncotarget.* 2017 Apr 4;8(14):23120-23129.
93. Zhang J, Ju H, Gao JR, Jiao XL, Lu Y. Polymorphisms in human telomerase reverse transcriptase (hTERT) gene, gene-gene and gene-smoking interaction with susceptibility to gastric cancer in Chinese Han population. *Oncotarget.* 2017 Mar 21;8(12):20235-20243.
94. Xiao XY, He WB. Genetic polymorphisms in the TERT-CLPTM1L region and lung cancer susceptibility in Chinese males. *Oncol Lett.* 2017 Aug;14(2):1588-1594.
95. Chiang YH, Chang YC, Lin HC, Huang L, Cheng CC, Wang WT, et al. Germline variations at JAK2, TERT, HBS1L-MYB and MECOM and the risk of myeloproliferative neoplasms in Taiwanese population. *Oncotarget.* 2017 Jul 12;8(44):76204-76213.
96. Ye G, Tan N, Meng CY, Li JJ, Jing L, Yan MD, et al. Genetic variations in TERC and TERT genes are associated with lung cancer risk in a Chinese Han population. *Oncotarget.* 2017 Nov 6;8(66):110145-110152.
97. Aydin M, Sümbül AT, Hilaloğullari GC, Bayram S. Genetic polymorphisms in human telomerase reverse transcriptase (hTERT) gene polymorphisms do not associated with breast cancer in patients in a turkish population: hospital-based case-control study. *Cell Mol Biol (Noisy-le-grand).* 2018 Feb 28;64(3):108-115.

98. Li CY, Wang XN, Li YF, Zhang XW, Sun MB, Liu SY, et al. Genetic polymorphisms in the TERT gene and susceptibility to non-small cell lung cancer in a Chinese Han population. *Cancer Manag Res.* 2018 Jun 11;10:1487-1495.
99. Bagherpour M, Gharibzad K, Rassi H. Association of CDH1 and TERT Single-Nucleotide Polymorphisms with Susceptibility to Familial Breast Cancer Risk. *Monoclon Antib Immunodiagn Immunother.* 2018 Dec;37(6):239-244.
100. Li Y, Xiang C, Shen N, Deng LY, Luo X, Yuan PH, et al. Functional polymorphisms on chromosome 5p15.33 disturb telomere biology and confer the risk of non-small cell lung cancer in Chinese population. *Mol Carcinog.* 2019 Jun;58(6):913-921.
101. Zhang NS, Zheng Y, Liu J, Lei TS, Xu YY, Yang M. Genetic variations associated with telomere length confer risk of gastric cardia adenocarcinoma. *Gastric Cancer.* 2019 Nov;22(6):1089-1099
102. Bhat GR, Bhat A, Verma S, Sethi I, Shah R, Sharma V, et al. Association of newly identified genetic variant rs2853677 of TERT with non-small cell lung cancer and leukemia in population of Jammu and Kashmir, India. *BMC Cancer.* 2019 May 24;19(1):493.
103. Matsuguma M, Yujiri T, Yamamoto K, Kajimura Y, Tokunaga Y, Tanaka M, et al. TERT and JAK2 polymorphisms define genetic predisposition to myeloproliferative neoplasms in Japanese patients. *Int J Hematol.* 2019 Dec;110(6):690-698.
104. Yoo SS, Kang HG, Choi JE, Hong MJ, Do SK, Lee JH, et al. The effect of susceptibility variants, identified in never-smoking female lung cancer cases, on male smokers. *Korean J Intern Med.* 2020 Jul;35(4):929-935.
105. Arimura-Omori M, Kiyohara C, Yanagihara T, Yamamoto Y, Ogata-Suetsugu S, Harada E, et al. Association between Telomere-Related Polymorphisms and the Risk of IPF and COPD as a Precursor Lesion of Lung Cancer: Findings from the Fukuoka Tobacco-Related Lung Disease (FOLD) Registry. *Asian Pac J Cancer Prev.* 2020 Mar 1;21(3):667-673.
106. Ma LL, Fan YX, Han ZC, Su Y, Chen R, Xu R, et al. Genetic variations associated with telomere length affect the risk of gastric carcinoma. *Medicine (Baltimore).* 2020 Jun 5;99(23):e20551.
107. Arshad A Pandith 1, Zahoor A Wani 1, Iqbal Qasim 1, Dil Afroz 1, Usmā Manzoor 1, Ina Amin, et al. Association of strong risk of hTERT gene polymorphic variants to malignant glioma and its prognostic implications with respect to different histological types and survival of glioma cases. *J Gene Med.* 2020 Nov;22(11):e3260
108. Mandour I, Mohamed-Hussein SA, Essam R, El-Hossainy MA. Study of genetic variants in chromosome 5p15.33 region in non-smoker lung cancer patients. *Adv Respir Med.* 2020;88(6):485-494.
109. Wang HJ, Yang H, Feng T, Geng TT, Chen C, Jin TB. Effects of TERT gene polymorphism and environmental factor interactions on lung cancer risk in the Xi'an Han population. *Int J Clin Exp Med* 2016;9(2):4200-4210.
