# Supplementary material for: Cumulative Evidence for Relationships Between Multiple Variants in the TERT and CLPTM1L Region and Risk of Cancer and Non-Cancer Disease
Source: PubMed Central journal article supplement (PMC9279858; doi:10.3389/fonc.2022.946039), 2022-06-30
Supplement: DataSheet_4.pdf [file DataSheet_4.pdf]

Supplementary Table S1. Associations between variants at the TRF1-CTCFM11 region associated with risk of human disease (in parentheses under additive model)

| Gene | Variant | Alleles*   | Disease | Disease type             | Ethnicity                       | MAF    | Studies | Cases | Controls | Risk of Meta-Analysis      | Heterogeneity    | Variance         | Crucial | Amount of Evidence | Protection from Bias | Initial study influence   | Low OR     | FFPZ             | Credibility*     |                          |                    |                     |             |              |       |       |       |     |        |          |
|------|---------|------------|---------|--------------------------|---------------------------------|--------|---------|-------|----------|----------------------------|------------------|------------------|---------|--------------------|----------------------|---------------------------|------------|------------------|------------------|--------------------------|--------------------|---------------------|-------------|--------------|-------|-------|-------|-----|--------|----------|
| ID   |         |            |         |                          |                                 |        |         |       |          | OR (95%CI)                 | P <sub>het</sub> | P <sub>var</sub> | Grade   | Grade              | Reason for Bias      | Reason for bias exemption | OR (95%CI) | P <sub>var</sub> | P <sub>top</sub> | P <sub>meta</sub>        | P <sub>meta</sub>  | Low OR              | FFPZ value† | Credibility* |       |       |       |     |        |          |
| 1    | TERT    | rs2739908  | CT      | Bladder cancer           | Caucasian                       | 0.1214 | 3       | 1063  | 1331     | <b>1.031 (1.008-1.013)</b> | <0.001           | 47.0             | 0.106   | AAA                | Moderate             | 2955                      | A          | B                | A                | No                       | NA                 | 1.210 (1.084-1.349) | 0.001       | No           | 0.560 | 0.806 | 1.000 | No  | 0.006  | Strong   |
| 2    | TERT    | rs2739910  | C/A     | Bladder cancer           | Caucasian                       | 0.2014 | 2       | 948   | 1649     | <b>1.112 (0.977-1.111)</b> | <0.001           | 40.9             | 0.836   | AAA                | Moderate             | 4401                      | A          | A                | C                | Low OR                   | No                 | 0.889 (0.769-0.995) | 0.004       | NA           | 0.793 | 0.308 | 1.000 | Yes | 0.152  | Weak     |
| 3    | CLPF1M1 | rs401861   | CT      | Bladder cancer           | Caucasian                       | 0.3633 | 4       | 1535  | 2300     | <b>0.832 (0.77-0.94)</b>   | 0.002            | 0.0              | 0.177   | AAA                | Strong               | 2766                      | A          | A                | A                | No                       | NA                 | 0.851 (0.784-0.961) | 0.001       | No           | 0.398 | 1.000 | 1.000 | No  | 0.029  | Strong   |
| 4    | CLPF1M1 | rs401730   | CT      | Bladder cancer           | Caucasian                       | 0.3256 | 1       | 498   | 508      | <b>0.855 (0.75-0.91)</b>   | <0.001           | 0.0              | 0.635   | AAA                | Strong               | 1796                      | A          | A                | A                | No                       | NA                 | 0.849 (0.789-0.962) | 0.012       | NA           | 0.233 | 1.000 | 1.000 | No  | 0.156  | Strong   |
| 5    | TERT    | MNS16A     | L/S     | Breast cancer            | Caucasian                       | 0.2560 | 4       | 2452  | 2514     | 1.065 (0.985-1.141)        | 0.005            | 73.6             | 0.010   | AAA                | Moderate             | 4888                      | A          | B                | A                | No                       | NA                 | 1.227 (1.096-1.273) | <0.001      | NA           | 0.827 | 1.000 | 0.399 | No  | 0.001  | Strong   |
| 6    | TERT    | rs13187280 | G/A     | Breast cancer            | Caucasian                       | 0.7312 | 3       | 5057  | 5702     | 0.963 (0.988-1.043)        | 0.149            | 0.0              | 0.681   | AAA                | Moderate             | 3240                      | A          | B                | A                | No                       | NA                 | 1.174 (1.091-1.260) | <0.001      | NA           | 0.103 | 0.296 | 1.000 | No  | 0.002  | Strong   |
| 7    | TERT    | rs2873780  | AG      | Breast cancer            | Caucasian                       | 0.6460 | 3       | 5057  | 5702     | 0.959 (0.982-1.034)        | 0.002            | 0.0              | 0.716   | AAA                | Moderate             | 2311                      | A          | B                | A                | No                       | NA                 | 1.181 (1.061-1.319) | <0.001      | NA           | 0.194 | 0.308 | 1.000 | No  | 0.001  | Strong   |
| 8    | TERT    | rs2739940  | AG      | Breast cancer            | Caucasian                       | 0.5282 | 6       | 5114  | 6640     | 0.978 (0.913-1.048)        | 0.134            | 31.4             | 0.212   | AAA                | Moderate             | 922                       | B          | A                | A                | No                       | NA                 | 1.198 (1.059-1.358) | <0.001      | NA           | 0.469 | 0.296 | 1.000 | No  | 0.001  | Strong   |
| 9    | TERT    | rs2739908  | CT      | Breast cancer            | Asian                           | 0.1429 | 1       | 48    | 591      | <b>2.681 (1.515-4.659)</b> | <0.001           | NA               | NA      | AAA                | Weak                 | 5704                      | A          | C                | C                | First study, small study | No                 | 0.776 (0.662-1.008) | 0.05        | NA           | 0.027 | 0.144 | 1.000 | No  | 0.286  | Weak     |
| 10   | TERT    | rs2739910  | C/A     | Breast cancer            | Caucasian                       | 0.4677 | 4       | 1262  | 1118     | 1.062 (0.986-1.132)        | 0.309            | 0.0              | 0.976   | AAA                | Moderate             | 2311                      | A          | B                | A                | No                       | NA                 | 1.181 (1.061-1.319) | <0.001      | NA           | 0.194 | 0.308 | 1.000 | No  | 0.001  | Strong   |
| 11   | TERT    | rs2739910  | G/A     | Breast cancer            | Caucasian                       | 0.2683 | 8       | 9487  | 12524    | 0.970 (0.923-1.016)        | 0.691            | 1.0              | 0.017   | AAA                | Moderate             | 643                       | A          | C                | C                | Low OR                   | No                 | 0.776 (0.662-1.008) | 0.05        | NA           | 0.027 | 0.144 | 1.000 | No  | 0.286  | Weak     |
| 12   | TERT    | rs2836869  | T/C     | Breast cancer            | Caucasian                       | 0.4844 | 10      | 8638  | 10338    | 1.006 (0.982-1.074)        | 0.370            | 41.6             | 0.000   | AAA                | Moderate             | 4888                      | A          | B                | A                | No                       | NA                 | 1.174 (1.091-1.260) | <0.001      | NA           | 0.103 | 0.296 | 1.000 | No  | 0.002  | Strong   |
| 13   | TERT    | rs2836870  | G/A     | Breast cancer            | Caucasian                       | 0.4424 | 3       | 5057  | 5702     | 1.030 (0.980-1.095)        | 0.111            | 0.0              | 0.780   | AAA                | Moderate             | 2311                      | A          | B                | A                | No                       | NA                 | 1.181 (1.061-1.319) | <0.001      | NA           | 0.194 | 0.308 | 1.000 | No  | 0.001  | Strong   |
| 14   | TERT    | rs2836869  | G/T     | Breast cancer            | Caucasian                       | 0.1496 | 3       | 5057  | 5702     | 0.977 (0.955-1.054)        | 0.141            | 0.0              | 0.847   | AAA                | Moderate             | 2311                      | A          | B                | A                | No                       | NA                 | 1.181 (1.061-1.319) | <0.001      | NA           | 0.194 | 0.308 | 1.000 | No  | 0.001  | Strong   |
| 15   | TERT    | rs772582   | A/C     | Breast cancer            | Caucasian                       | 0.2791 | 3       | 5057  | 5702     | 1.035 (0.927-1.156)        | 0.540            | 58.0             | 0.133   | AAA                | Moderate             | 40220                     | A          | A                | C                | Low OR                   | No                 | 1.072 (1.039-1.106) | <0.001      | No           | 0.298 | 1.000 | 0.725 | Yes | <0.001 | Moderate |
| 16   | TERT    | rs2739910  | C/A     | Colorectal cancer        | Caucasian                       | 0.4880 | 10      | 19650 | 21500    | <b>1.079 (1.048-1.102)</b> | <0.001           | 0.0              | 0.170   | AAA                | Strong               | 1774                      | A          | A                | A                | No                       | NA                 | 1.226 (1.091-1.380) | <0.001      | NA           | 0.397 | 0.296 | 1.000 | No  | <0.001 | Strong   |
| 17   | TERT    | rs2739910  | C/A     | Esophageal cancer        | Asian                           | 0.0055 | 3       | 2098  | 2150     | <b>0.748 (0.64-0.79)</b>   | <0.001           | 0.0              | 0.186   | AAA                | Strong               | 4888                      | A          | A                | A                | No                       | NA                 | 0.722 (0.643-0.818) | <0.001      | NA           | 0.339 | 0.296 | 1.000 | No  | <0.001 | Strong   |
| 18   | TERT    | rs2836869  | AG      | Esophageal cancer        | Asian                           | 0.2480 | 3       | 2098  | 2150     | <b>1.291 (1.195-1.379)</b> | <0.001           | 0.0              | 0.186   | AAA                | Moderate             | 2311                      | A          | B                | A                | No                       | NA                 | 1.227 (1.096-1.273) | <0.001      | NA           | 0.827 | 1.000 | 0.399 | No  | 0.001  | Strong   |
| 19   | CLPF1M1 | rs401861   | CT      | Esophageal cancer        | Caucasian                       | 0.3366 | 3       | 1742  | 1856     | <b>0.805 (0.743-0.876)</b> | 0.003            | 0.2              | 0.300   | AAA                | Strong               | 2266                      | A          | A                | A                | No                       | NA                 | 0.807 (0.736-0.874) | 0.002       | NA           | 0.499 | 1.000 | 1.000 | No  | 0.008  | Strong   |
| 20   | CLPF1M1 | rs401861   | C/A     | Esophageal cancer        | Caucasian                       | 0.2128 | 3       | 1742  | 1856     | <b>0.876 (0.78-0.98)</b>   | 0.001            | 0.0              | 0.978   | AAA                | Moderate             | 922                       | B          | A                | A                | No                       | NA                 | 0.796 (0.736-0.853) | <0.001      | NA           | 0.469 | 0.296 | 1.000 | No  | 0.156  | Moderate |
| 21   | TERT    | rs1006800  | AG      | Osteic cancer            | Asian                           | 0.1816 | 4       | 2470  | 2236     | <b>1.317 (1.193-1.454)</b> | <0.001           | 28.5             | 0.241   | AAA                | Moderate             | 2366                      | A          | B                | A                | No                       | NA                 | 1.317 (1.193-1.454) | <0.001      | No           | 0.304 | 0.308 | 0.311 | No  | 0.000  | Strong   |
| 22   | TERT    | rs2739940  | AG      | Osteic cancer            | Caucasian                       | 0.3234 | 3       | 641   | 1528     | 1.302 (0.892-2.040)        | 0.416            | 94.1             | <0.001  | AAA                | Weak                 | 5704                      | A          | C                | C                | First study, small study | No                 | 0.776 (0.662-1.008) | 0.05        | NA           | 0.027 | 0.144 | 1.000 | No  | 0.286  | Weak     |
| 23   | TERT    | rs2739910  | C/A     | Osteic cancer            | Caucasian                       | 0.3684 | 1       | 184   | 209      | 0.600 (0.40-0.908)         | 0.047            | NA               | NA      | AAA                | Weak                 | 4771                      | A          | C                | C                | First study, small study | No                 | 0.673 (0.519-0.939) | <0.001      | Yes          | 0.244 | 0.734 | 0.611 | No  | 0.514  | Weak     |
| 24   | TERT    | rs2836876  | T/C     | Osteic cancer            | Asian                           | 0.3150 | 2       | 137   | 1319     | 1.748 (0.88-3.439)         | 0.103            | 93.8             | <0.001  | AAA                | Weak                 | 7851                      | A          | C                | C                | First study, small study | No                 | 0.803 (0.724-0.900) | <0.001      | No           | 0.064 | 0.734 | 0.448 | No  | 0.428  | Weak     |
| 25   | TERT    | rs2739910  | C/A     | Glioma                   | Caucasian                       | 0.8466 | 8       | 3750  | 8379     | <b>0.748 (0.66-0.825)</b>  | <0.001           | 77.0             | 0.001   | AAA                | Strong               | 12754                     | A          | A*               | A                | No                       | Identified by GWAS | 0.748 (0.66-0.85)   | <0.001      | No           | 0.234 | 0.386 | 1.000 | No  | <0.001 | Strong   |
| 26   | TERT    | rs2836876  | T/C     | Glioma                   | Asian                           | 0.4572 | 2       | 1682  | 1267     | <b>0.893 (0.78-0.99)</b>   | 0.036            | 91.4             | 0.001   | AAA                | Strong               | 2069                      | A          | A                | A                | Publication bias         | Identified by GWAS | 0.787 (0.709-0.873) | <0.001      | No           | 0.237 | 0.072 | 1.000 | No  | <0.001 | Strong   |
| 27   | TERT    | rs2739908  | CT      | Hepatocellular carcinoma | Asian                           | 0.3453 | 3       | 846   | 867      | 1.211 (0.948-1.548)        | 0.125            | 65.1             | 0.057   | AAA                | Moderate             | 2751                      | A          | A                | A                | No                       | Identified by GWAS | 1.372 (1.196-1.562) | <0.001      | NA           | 0.397 | 0.296 | 1.000 | No  | <0.001 | Strong   |
| 28   | TERT    | rs2739910  | C/A     | Hepatocellular carcinoma | Asian                           | 0.5938 | 3       | 397   | 1848     | <b>1.760 (1.268-2.23)</b>  | <0.001           | 0.0              | 0.939   | AAA                | Strong               | 2751                      | A          | A                | A                | No                       | Identified by GWAS | 1.760 (1.268-2.23)  | <0.001      | NA           | 0.397 | 0.296 | 1.000 | No  | <0.001 | Strong   |
| 29   | TERT    | rs2426262  | G/A     | Lung cancer              | Miscellany                      | 0.1630 | 3       | 3631  | 4013     | <b>1.548 (1.46-1.724)</b>  | 0.003            | 0.0              | 0.562   | AAA                | Strong               | 1774                      | A          | A                | A                | No                       | NA                 | 1.296 (1.091-1.486) | 0.012       | NA           | 0.579 | 0.296 | 0.518 | No  | 0.013  | Strong   |
| 30   | TERT    | rs2739908  | CT      | Lung cancer              | Miscellany                      | 0.2299 | 1       | 474   | 1061     | 1.174 (0.99-1.536)         | 0.069            | NA               | NA      | AAA                | Moderate             | 7934                      | A          | B                | A                | No                       | NA                 | 1.252 (1.142-1.366) | <0.001      | No           | 0.237 | 0.152 | 1.000 | No  | <0.001 | Strong   |
| 31   | TERT    | rs2739908  | CT      | Lung cancer              | NSCLC (Adenocarcinoma)          | 0.3362 | 3       | 1131  | 2203     | <b>1.481 (1.28-1.675)</b>  | <0.001           | 0.0              | 0.749   | AAA                | Moderate             | 922                       | B          | A                | A                | No                       | NA                 | 1.481 (1.28-1.675)  | <0.001      | NA           | 0.469 | 0.296 | 1.000 | No  | 0.008  | Strong   |
| 32   | TERT    | rs2739908  | CT      | Lung cancer              | NSCLC (Adenocarcinoma)          | 0.3362 | 3       | 556   | 2203     | 1.098 (0.954-1.263)        | 0.193            | 0.0              | 0.495   | AAA                | Strong               | 6625                      | A          | A*               | A                | Small study              | Identified by GWAS | 0.854 (0.762-0.952) | <0.001      | No           | 0.067 | 0.802 | 0.122 | No  | 0.005  | Strong   |
| 33   | TERT    | rs2739910  | C/A     | Lung cancer              | NSCLC (Squamous cell carcinoma) | 0.5024 | 27      | 33918 | 35844    | <b>0.846 (0.786-0.913)</b> | <0.001           | 96.9             | <0.001  | AAA                | Strong               | 12754                     | A          | A                | A                | No                       | Identified by GWAS | 0.846 (0.786-0.913) | <0.001      | No           | 0.067 | 0.802 | 0.122 | No  | 0.005  | Strong   |
| 34   | TERT    | rs2739910  | C/A     | Lung cancer              | NSCLC (Adenocarcinoma)          | 0.4927 | 5       | 13061 | 16151    | <b>0.874 (0.84-0.903)</b>  | <0.001           | 0.0              | 0.756   | AAA                | Strong               | 7934                      | A          | A                | A                | No                       | NA                 | 1.252 (1.142-1.366) | <0.001      | NA           | 0.237 | 0.152 | 1.000 | No  | <0.001 | Strong   |
| 35   | TERT    | rs2739910  | C/A     | Lung cancer              | NSCLC (Adenocarcinoma)          | 0.4927 | 21      | 18017 | 15289    | <b>0.874 (0.78-0.97)</b>   | <0.001           | 29.0             | 0.006   | AAA                | Moderate             | 922                       | B          | A                | A                | No                       | NA                 | 1.252 (1.142-1.366) | <0.001      | NA           | 0.237 | 0.152 | 1.000 | No  | <0.001 | Strong   |
| 36   | TERT    | rs2739910  | C/A     | Lung cancer              | NSCLC (Adenocarcinoma)          | 0.4927 | 1       | 40    | 40       | 1.061 (0.51-2.237)         | 0.044            | NA               | NA      | AAA                | Weak                 | 2069                      | A          | A                | A                | Small study              | Identified by GWAS | 0.797 (0.693-0.917) | 0.002       | No           | 0.074 | 0.296 | 1.000 | No  | 0.002  | Strong   |
| 37   | TERT    | rs2836876  | G/A     | Lung cancer              | NSCLC (Adenocarcinoma)          | 0.4927 | 10      | 2730  | 2020     | <b>0.788 (0.72-0.87)</b>   | <0.001           | 62.4             | 0.006   | AAA                | Strong               | 2069                      | A          | A                | A                | No                       | NA                 | 0.788 (0.72-0.87)   | <0.001      | NA           | 0.469 | 0.296 | 1.000 | No  | 0.001  | Strong   |
| 38   | CLPF1M1 | rs131489   | G/A     | Lung cancer              | Miscellany                      | 0.3258 | 3       | 4443  | 16328    | 1.062 (0.868-1.306)        | 0.196            | 94.1             | 0.001   | AAA                | Strong               | 10200                     | A          | A*               | A                | No                       | Identified by GWAS | 0.851 (0.769-0.911) | <0.001      | NA           | 0.304 | 0.368 | 1.000 | No  | <0.001 | Strong   |
| 39   | CLPF1M1 | rs131489   | C/A     | Lung cancer              | NSCLC (Squamous cell carcinoma) | 0.2698 | 3       | 1725  | 2143     | <b>0.842 (0.68-1.039)</b>  | 0.139            | 70.7             | 0.033   | AAA                | Moderate             | 2366                      | A          | B                | A                | No                       | NA                 | 0.842 (0.68-1.039)  | 0.033       | NA           | 0.499 | 1.000 | 1.000 | No  | 0.008  | Strong   |
| 40   | CLPF1M1 | rs401861   | CT      | Lung cancer              | NSCLC (Squamous cell carcinoma) | 0.3362 | 14      | 11290 | 12390    | <b>0.888 (0.84-0.94)</b>   | <0.001           | 35.5             | 0.073   | AAA                | Strong               | 16224                     | A          | A                | A                | Low OR                   | Identified by GWAS | 0.887 (0.83-0.946)  | <0.001      | No           | 0.735 | 0.902 | 0.287 | Yes | <0.001 | Strong   |
| 41   | CLPF1M1 | rs401861   | CT      | Lung cancer              | NSCLC (Squamous cell carcinoma) | 0.3362 | 10      | 10109 | 13800    | <b>0.888 (0.78-0.99)</b>   | <0.001           | 48.0             | 0.044   | AAA                | Strong               | 16224                     | A          | A                | A                | Low OR                   | Identified by GWAS | 0.887 (0.83-0.946)  | <0.001      | No           | 0.735 | 0.902 | 0.287 | Yes | <0.001 | Strong   |
| 42   | CLPF1M1 | rs401861   | CT      | Lung cancer              | NSCLC (Squamous cell carcinoma) | 0.4425 | 2       | 4730  | 2375     | <b>0.875 (0.77-0.97)</b>   | <0.001           | 46.0             | 0.049   | AAA                | Strong               | 2069                      | A          | A                | A                | No                       | NA                 | 0.875 (0.77-0.97)   | <0.001      | NA           | 0.469 | 0.296 | 1.000 | No  | 0.001  | Strong   |
| 43   | CLPF1M1 | rs401861   | CT      | Lung cancer              | NSCLC (Squamous cell carcinoma) | 0.4425 | 2       | 1559  | 2478     | 0.939 (0.858-1.027)        | 0.167            | 97.1             | 0.127   | AAA                | Strong               | 2069                      | A          | A                | A                | No                       | NA                 | 0.939 (0.858        |             |              |       |       |       |     |        |          |
