# Supplementary material for: Cumulative Evidence for Relationships Between Multiple Variants in the TERT and CLPTM1L Region and Risk of Cancer and Non-Cancer Disease
Source: PubMed Central journal article supplement (PMC9279858; doi:10.3389/fonc.2022.946039), 2022-06-30
Supplement: DataSheet_5.pdf [file DataSheet_5.pdf]

Supplementary Table 4: Variants in *TERT-CLPTMIL* genes showing no relation to cancer or non-cancerous risk in meta-analyses in additive model

| Gene         | Variant    | Allele <sup>a</sup> | Disease                  | Ethnicity | MAF <sup>b</sup> | Number Evaluation |       |          | Risk of Meta-Analysis |                     |                   | Heterogeneity      |                | Power (%) | the value of Power (%) if the MAF is 0.2 | the value of power (%) if the MAF is 0.1 |
|--------------|------------|---------------------|--------------------------|-----------|------------------|-------------------|-------|----------|-----------------------|---------------------|-------------------|--------------------|----------------|-----------|------------------------------------------|------------------------------------------|
|              |            |                     |                          |           |                  | Datasets          | Cases | Controls | Sample size           | OR (95%CI)          | P <sub>meta</sub> | I <sup>2</sup> (%) | P <sub>Q</sub> |           |                                          |                                          |
| TERT         | MNS16A     | LS                  | Breast cancer            | Caucasian | 0.2260           | 4                 | 2452  | 2554     | 5006                  | 1.065 (0.845-1.341) | 0.595             | 73.6               | 0.010          | 83.84     | 80.64                                    | 56.91                                    |
| TERT         | rs13167280 | G/A                 | Breast cancer            | Caucasian | 0.7312           | 3                 | 5057  | 5702     | 10759                 | 0.963 (0.888-1.043) | 0.149             | 0.0                | 0.681          | 99.11     | 98.20                                    | 86.54                                    |
| TERT         | rs2075786  | A/G                 | Breast cancer            | Caucasian | 0.6460           | 3                 | 5057  | 5702     | 10759                 | 0.996 (0.942-1.054) | 0.902             | 0.0                | 0.716          | 99.69     | 98.20                                    | 86.54                                    |
| TERT         | rs2759940  | A/G                 | Breast cancer            | Overall   | 0.5282           | 6                 | 5514  | 6640     | 12154                 | 0.978 (0.915-1.048) | 0.534             | 31.4               | 0.212          | 99.93     | 98.86                                    | 89.26                                    |
| TERT         | rs2759940  | A/G                 | Breast cancer            | Caucasian | 0.5324           | 5                 | 5446  | 6049     | 11495                 | 1.006 (0.957-1.059) | 0.803             | 83.6               | <0.001         | 99.92     | 98.78                                    | 88.89                                    |
| TERT         | rs2756100  | C/A                 | Breast cancer            | Caucasian | 0.4677           | 4                 | 1262  | 1118     | 2380                  | 1.042 (0.946-1.152) | 0.309             | 0.0                | 0.976          | 69.84     | 52.65                                    | 33.42                                    |
| TERT         | rs2756109  | G/A                 | Breast cancer            | Overall   | 0.4663           | 8                 | 9457  | 12824    | 22281                 | 0.987 (0.922-1.056) | 0.704             | 59.1               | 0.017          | 99.99     | 99.98                                    | 98.72                                    |
| TERT         | rs2756109  | G/A                 | Breast cancer            | Caucasian | 0.4696           | 7                 | 9130  | 12257    | 21387                 | 0.995 (0.957-1.035) | 0.809             | 64.8               | 0.009          | 99.99     | 99.98                                    | 98.45                                    |
| TERT         | rs2756109  | G/A                 | Breast cancer            | Asian     | 0.3343           | 1                 | 327   | 567      | 894                   | 1.623 (0.841-3.246) | 0.817             | NA                 | NA             | 22.59     | 17.80                                    | 12.20                                    |
| TERT         | rs2833669  | T/C                 | Breast cancer            | Caucasian | 0.4864           | 10                | 8635  | 10358    | 18993                 | 1.006 (0.942-1.074) | 0.870             | 41.6               | 0.080          | 99.99     | 99.96                                    | 97.96                                    |
| TERT         | rs2833677  | G/A                 | Breast cancer            | Caucasian | 0.4124           | 3                 | 5057  | 5702     | 10759                 | 1.036 (0.980-1.095) | 0.211             | 0.0                | 0.780          | 99.84     | 98.20                                    | 86.54                                    |
| TERT         | rs2833690  | G/T                 | Breast cancer            | Caucasian | 0.1496           | 3                 | 5057  | 5702     | 10759                 | 0.977 (0.905-1.054) | 0.541             | 0.0                | 0.847          | 95.26     | 98.20                                    | 86.54                                    |
| TERT         | rs712562   | A/C                 | Breast cancer            | Caucasian | 0.2791           | 3                 | 5057  | 5702     | 10759                 | 1.035 (0.927-1.156) | 0.540             | 50.4               | 0.133          | 99.48     | 98.20                                    | 86.54                                    |
| TERT         | rs2759940  | A/G                 | Gastric cancer           | Overall   | 0.3234           | 3                 | 441   | 1528     | 2169                  | 1.302 (0.680-2.600) | 0.416             | 94.1               | <0.001         | 38.76     | 39.33                                    | 19.86                                    |
| TERT         | rs2759940  | A/G                 | Gastric cancer           | Asian     | 0.3150           | 2                 | 537   | 1319     | 1856                  | 1.748 (0.894-3.419) | 0.103             | 93.8               | <0.001         | 33.11     | 26.22                                    | 16.98                                    |
| TERT         | rs2756098  | C/T                 | Hepatocellular carcinoma | Asian     | 0.3453           | 3                 | 846   | 867      | 1713                  | 1.211 (0.948-1.548) | 0.125             | 65.1               | 0.057          | 49.67     | 38.19                                    | 24.06                                    |
| TERT         | rs4246742  | T/A                 | Lung cancer              | Asian     | 0.6252           | 3                 | 3305  | 3720     | 7025                  | 1.133 (0.875-1.467) | 0.343             | 82.0               | 0.004          | 97.07     | 90.65                                    | 69.77                                    |
| TERT/CLPTMIL | rs4259069  | G/A                 | Pancreatic cancer        | Caucasian | 0.2067           | 3                 | 2591  | 4383     | 7974                  | 1.026 (0.943-1.117) | 0.447             | 56.3               | 0.208          | 83.47     | 82.73                                    | 69.24                                    |

<sup>a</sup>Major alleles (reference)/Minor alleles.

<sup>b</sup>Frequency of minor allele in controls.
