# Supplementary material for: Cumulative Evidence for Relationships Between Multiple Variants in the TERT and CLPTM1L Region and Risk of Cancer and Non-Cancer Disease
Source: PubMed Central journal article supplement (PMC9279858; doi:10.3389/fonc.2022.946039), 2022-06-30
Supplement: DataSheet_6.pdf [file DataSheet_6.pdf]

**Supplementary Table 5. Analyses of expression quantitative trait locus (eQTL) in significant variants associated with risk of cancer and non-neoplastic diseases**

| <b>Variant</b> | <b>Gene</b> | <b>Tissue</b>                       | <b>P value</b>         | <b>Effect Size</b> |
|----------------|-------------|-------------------------------------|------------------------|--------------------|
| rs2736100      | TERT        | Skin-Not Sun Exposed (Suprapubic)   | $4.8 \times 10^{-5}$   | 0.23               |
| rs2853676      | TERT        | Skin-Sun Exposed (Lower Leg)        | $2.0 \times 10^{-6}$   | 0.28               |
| rs2853677      | TERT        | Skin-Not Sun Exposed (Suprapubic)   | $3.9 \times 10^{-6}$   | 0.29               |
|                | TERT        | Skin-Sun Exposed (Lower Leg)        | $1.6 \times 10^{-5}$   | 0.24               |
|                | TERT        | Skin-Not Sun Exposed (Suprapubic)   | $2.6 \times 10^{-5}$   | 0.21               |
| rs31489        | CLPTM1L     | Esophagus - Mucosa                  | $7.10 \times 10^{-12}$ | -0.29              |
|                | CLPTM1L     | Skin - Not Sun Exposed (Suprapubic) | $2.30 \times 10^{-8}$  | -0.11              |
|                | CLPTM1L     | Stomach                             | $8.80 \times 10^{-7}$  | 0.11               |
|                | CLPTM1L     | Skin - Sun Exposed (Lower leg)      | $2.2 \times 10^{-6}$   | -0.097             |
|                | CLPTM1L     | Artery - Tibial                     | $2.8 \times 10^{-5}$   | 0.075              |
| rs401681       | CLPTM1L     | Esophagus - Mucosa                  | $6.10 \times 10^{-14}$ | -0.31              |
|                | CLPTM1L     | Skin - Not Sun Exposed (Suprapubic) | $3.60 \times 10^{-12}$ | -0.14              |
|                | CLPTM1L     | Skin - Sun Exposed (Lower leg)      | $3.30 \times 10^{-9}$  | -0.12              |
|                | CLPTM1L     | Stomach                             | $3.1 \times 10^{-6}$   | 0.097              |
| rs402710       | CLPTM1L     | Esophagus - Mucosa                  | $4.00 \times 10^{-11}$ | -0.29              |
|                | CLPTM1L     | Skin - Not Sun Exposed (Suprapubic) | $4.10 \times 10^{-8}$  | -0.12              |
|                | CLPTM1L     | Skin - Sun Exposed (Lower leg)      | $2.80 \times 10^{-6}$  | -0.1               |
| rs465498       | CLPTM1L     | Esophagus - Mucosa                  | $1.50 \times 10^{-14}$ | -0.31              |
|                | CLPTM1L     | Skin - Not Sun Exposed (Suprapubic) | $5.90 \times 10^{-12}$ | -0.13              |
|                | CLPTM1L     | Skin - Sun Exposed (Lower leg)      | $1.40 \times 10^{-8}$  | -0.11              |
|                | CLPTM1L     | Stomach                             | $6.2 \times 10^{-6}$   | 0.093              |
| rs4975616      | CLPTM1L     | Esophagus - Mucosa                  | $4.30 \times 10^{-13}$ | 0.3                |
|                | CLPTM1L     | Skin - Not Sun Exposed (Suprapubic) | $6.30 \times 10^{-10}$ | 0.12               |
|                | CLPTM1L     | Skin - Sun Exposed (Lower leg)      | $7.40 \times 10^{-7}$  | 0.1                |
|                | CLPTM1L     | Stomach                             | $5.3 \times 10^{-6}$   | -0.096             |

Data source: Genotype-Tissue Expression (GTEx) Project.
