# Supplementary material for: Cumulative Evidence for Relationships Between Multiple Variants in the TERT and CLPTM1L Region and Risk of Cancer and Non-Cancer Disease
Source: PubMed Central journal article supplement (PMC9279858; doi:10.3389/fonc.2022.946039), 2022-06-30
Supplement: DataSheet_7.pdf [file DataSheet_7.pdf]

**Supplementary Table 6. Linkage Disequilibrium ( $r^2$ ) among the significant variants in the *TERT-CLPTM1L* genes.**

| SNP Pair <sup>1</sup>  | Asian <sup>2</sup> | European <sup>2</sup> | African <sup>2</sup> |
|------------------------|--------------------|-----------------------|----------------------|
| rs10069690 & rs2242652 | 0.9166             | 0.6409                | 0.0657               |
| rs10069690 & rs2736098 | 0.0067             | 0.0124                | 0.0045               |
| rs10069690 & rs2736100 | 0.2693             | 0.2812                | 0.1816               |
| rs10069690 & rs2853676 | 0.2337             | 0.0905                | 0.0718               |
| rs10069690 & rs2853677 | 0.1285             | 0.0360                | 0.0376               |
| rs10069690 & rs2853691 | 0.0047             | 0.0526                | 0.0021               |
| rs2242652 & rs2736098  | 0.0049             | 0.3800                | 0.0014               |
| rs2242652 & rs2736100  | 0.2709             | 0.1864                | 0.1387               |
| rs2242652 & rs2853676  | 0.2453             | 0.1117                | 0.3249               |
| rs2242652 & rs2853677  | 0.1286             | 0.0633                | 0.2350               |
| rs2242652 & rs2853691  | 0.0574             | 0.1523                | 0.0068               |
| rs2736098 & rs2736100  | 0.2416             | 0.0937                | 0.0493               |
| rs2736098 & rs2853676  | 0.0025             | 0.0002                | 0.1597               |
| rs2736098 & rs2853677  | 0.3070             | 0.1504                | 0.0032               |
| rs2736098 & rs2853691  | 0.0012             | 0.0012                | 0.0033               |
| rs2736100 & rs2853676  | 0.2057             | 0.2475                | 0.1062               |
| rs2736100 & rs2853677  | 0.5789             | 0.4352                | 0.2031               |
| rs2736100 & rs2853691  | 0.0110             | 0.0104                | 0.0063               |
| rs2853676 & rs2853677  | 0.2392             | 0.3317                | 0.2192               |
| rs2853676 & rs2853691  | 0.0096             | 0.0024                | 0.0106               |
| rs2853677 & rs2853691  | 0.0031             | 0.0002                | 0.0000               |
| rs31489 & rs401681     | 0.4785             | 0.8145                | 0.6131               |
| rs31489 & rs402710     | 0.4634             | 0.6624                | 0.8376               |
| rs31489 & rs465498     | 0.9373             | 0.8516                | 0.6572               |
| rs401681 & rs402710    | 0.9371             | 0.6624                | 0.5961               |
| rs401681 & rs465498    | 0.4839             | 0.9601                | 0.9332               |
| rs402710 & rs465498    | 0.4692             | 0.5959                | 0.6345               |
| rs31489 & rs10069690   | 0.0005             | 0.0112                | 0.0809               |
| rs31489 & rs2242652    | 0.0004             | 0.0335                | 0.0295               |
| rs31489 & rs2736098    | 0.0379             | 0.1400                | 0.0463               |
| rs31489 & rs2736100    | 0.0091             | 0.0129                | 0.0300               |
| rs31489 & rs2853676    | 0.0058             | 0.0051                | 0.1224               |
| rs31489 & rs2853677    | 0.0001             | 0.0372                | 0.0693               |
| rs31489 & rs2853691    | 0.0117             | 0.0065                | 0.0029               |
| rs401681 & rs10069690  | 0.0147             | 0.0250                | 0.0752               |
| rs401681 & rs2242652   | 0.0139             | 0.0649                | 0.0552               |
| rs401681 & rs2736098   | 0.0857             | 0.1696                | 0.0809               |
| rs401681 & rs2736100   | 0.0458             | 0.0039                | 0.0023               |
| rs401681 & rs2853676   | 0.0009             | 0.0050                | 0.2054               |
| rs401681 & rs2853677   | 0.0179             | 0.0145                | 0.0471               |
| rs401681 & rs2853691   | 0.0185             | 0.0114                | 0.0004               |
| rs402710 & rs10069690  | 0.014              | 0.0013                | 0.0611               |
| rs402710 & rs2242652   | 0.0133             | 0.0080                | 0.0287               |
| rs402710 & rs2736098   | 0.0853             | 0.0996                | 0.0483               |
| rs402710 & rs2736100   | 0.0426             | 0.0179                | 0.0197               |
| rs402710 & rs2853676   | 0.0007             | 0.0274                | 0.1252               |
| rs402710 & rs2853677   | 0.0174             | 0.0098                | 0.0729               |
| rs402710 & rs2853691   | 0.0003             | 0.0142                | 0.0025               |

---

|                       |        |        |        |
|-----------------------|--------|--------|--------|
| rs465498 & rs10069690 | 0.0002 | 0.0236 | 0.0841 |
| rs465498 & rs2242652  | 0.0000 | 0.0624 | 0.0528 |
| rs465498 & rs2736098  | 0.0404 | 0.1696 | 0.0748 |
| rs465498 & rs2736100  | 0.0053 | 0.0044 | 0.0051 |
| rs465498 & rs2853676  | 0.0083 | 0.0050 | 0.1896 |
| rs465498 & rs2853677  | 0.0000 | 0.0155 | 0.0483 |
| rs465498 & rs2853691  | 0.0060 | 0.0105 | 0.0000 |

---

Note: NA = not applicable.

<sup>1</sup>Data source: ldlink.nci.nih.gov.

<sup>2</sup>Asians, European, and African were selected from five major population categories provided by the databases.
